1 **Cardiovirus leader proteins retarget RSK kinases toward alternative**  
2 **substrates to perturb nucleocytoplasmic traffic**

3

4 Belén Lizcano-Perret<sup>1</sup>, Cécile Lardinois<sup>1</sup>, Fanny Wavreil<sup>1</sup>, Philippe Hauchamps<sup>2</sup>, Gaëtan

5 Herinckx<sup>3</sup>, Frédéric Sorgeloos<sup>1</sup>, Didier Vertommen<sup>3</sup>, Laurent Gatto<sup>2</sup> and Thomas Michiels<sup>1\*</sup>

6

7 <sup>1</sup> VIRO unit, de Duve Institute, Université Catholique de Louvain, Brussels, Belgium

8 <sup>2</sup> CBIO unit, de Duve Institute, Université Catholique de Louvain, Brussels, Belgium

9 <sup>3</sup> PHOS unit and MASSPROT platform, de Duve Institute, Université Catholique de Louvain,

10 Brussels, Belgium

11

12

13 \*Corresponding author: [thomas.michiels@uclouvain.be](mailto:thomas.michiels@uclouvain.be) (TM)

14

15

## 16 **Abstract**

17 Proteins from some unrelated pathogens, including viruses and bacteria can recruit and  
18 activate cellular p90-ribosomal protein S6 kinases (RSKs) through a common linear motif.  
19 Our data suggested that such pathogens' proteins might act as adapters to dock the kinase  
20 toward specific substrates. We explored this hypothesis using the *Cardiovirus* leader protein  
21 (L) as a paradigm. L is known to trigger phenylalanine-glycine nucleoporins (FG-NUPs)  
22 hyperphosphorylation and nucleocytoplasmic trafficking perturbation. Using a biotin ligase  
23 fused to either RSK or to L, we identified FG-NUPs as primary partners of the L-RSK  
24 complex in infected cells. Mutant analysis shows that L uses distinct motifs to recruit RSK  
25 and to dock the L-RSK complex toward the FG-NUPs. Using an analog-sensitive RSK2  
26 mutant kinase, we show that, in infected cells, L can trigger RSK to use NUP98 and NUP214  
27 as direct substrates. Our data illustrate a novel virulence mechanism where pathogens'  
28 proteins retarget cellular protein kinases toward specific substrates.

29

30

## 31 **Introduction**

32 Proteins encoded by several unrelated pathogens, including RNA viruses, DNA viruses and  
33 bacteria, were recently shown to use a common short linear motif (D/E-D/E-V-F, referred to  
34 as DDVF hereafter) to recruit members of the cellular p90-ribosomal S6 protein kinases  
35 (RSKs) family: RSK1, RSK2, RSK3 and RSK4<sup>1,2</sup>. Interestingly, competition and cross-  
36 linking experiments, as well as crystallography data show that these pathogens' proteins, the  
37 leader (L) protein (cardioviruses), ORF45 (Kaposi sarcoma-associated herpes virus - KSHV)  
38 and YopM (*Yersinia*) use a common interface to recruit RSKs. Binding of the pathogens'  
39 proteins prevents RSK dephosphorylation by cellular phosphatases, thereby maintaining RSK

40 in an active state <sup>1,2</sup>. Although infection with all three pathogens leads to RSK activation, the  
41 outcome of this activation differs according to the protein bound to RSK. YopM association  
42 with RSK was proposed to inhibit the inflammasome and to lead to IL-10 production <sup>3,4</sup>; RSK  
43 recruitment by ORF45 enhances lytic replication of KSHV <sup>5,6</sup>, whereas RSK recruitment by  
44 cardiovirus L protein leads to the inhibition of the antiviral eukaryotic initiation factor 2 alpha  
45 kinase 2 (EIF2AK2), better known as PKR <sup>1</sup>.

46 PKR inhibition by L was shown to depend on L interaction with RSK but also on L protein's  
47 C-terminal domain. Indeed, the M60V mutation in the C-terminal domain of L does not affect  
48 RSK recruitment but abolishes PKR inhibition. These observations led us to propose the  
49 "model of the clamp" whereby pathogens' proteins would act as adaptor proteins that force a  
50 given enzyme (here RSKs) to act on a specific substrate. Through their DDVF motif,  
51 pathogens' proteins recruit and maintain RSKs in an activated state. Through another domain  
52 (i.e. the C-terminal domain for L), they recruit proteins that could serve as substrate for  
53 RSKs. After phosphorylation, such proteins would act as effectors to the benefit of the  
54 pathogen (Fig 1A) <sup>1</sup>. In an alternative model, proteins interacting with RSK through the  
55 conserved DDVF motif could directly act as preferential substrates for RSK-mediated  
56 phosphorylation (Fig 1B), as was suggested for the cellular protein RHBDF1 (Rhomboïd 5  
57 homolog 1) <sup>2</sup>.

58

59 Cardioviruses belong to the *Picornaviridae* family and include encephalomyocarditis virus  
60 (EMCV), Theiler's murine encephalomyelitis virus (TMEV) and the human Saffold virus  
61 (SAFV), closely related to TMEV. Despite its very small size (67-76 amino acids) and lack  
62 of enzymatic activity, the L protein encoded by these viruses was shown to be  
63 multifunctional as, beside inhibiting PKR, it blocks interferon gene transcription, and  
64 triggers an extensive diffusion of nuclear and cytoplasmic proteins across the nuclear

65 membrane <sup>1,7-16</sup>. This nucleocytoplasmic trafficking perturbation was associated with the  
66 hyperphosphorylation of phenylalanine-glycine-nucleoporins (FG-NUPs) such as NUP98,  
67 NUP153 or NUP62 <sup>17-20</sup>. FG-NUPs are proteins of the nuclear pore complex (NPC) that  
68 possess intrinsically disordered domains, rich in phenylalanine and glycine residues. These  
69 domains form a mesh in the center of the nuclear pore, which enables interaction with  
70 karyopherins, thus allowing selective transport of proteins and RNA through the NPC <sup>21-24</sup>.  
71 Molecular dynamic simulations predict that FG-NUP phosphorylation drastically decreases  
72 the density of FG-NUPs inside the pore <sup>25</sup>. Accordingly, electron microscopy analysis of  
73 EMCV-infected cells displayed such a density loss in the center of the NPC <sup>20</sup>. Through  
74 perturbation of the NPC, cardioviruses trigger a diffusion of nuclear proteins to the cytoplasm  
75 which can be used by the virus for viral replication and translation <sup>16</sup>.

76

77 Preliminary data suggested that nucleocytoplasmic trafficking perturbation by cardiovirus L  
78 proteins depended on RSK and on the recruitment of a cellular target by the L-RSK complex  
79 (model of the clamp). The aim of this work was to assess whether RSK could indeed be  
80 retargeted by L to a new substrate in infected cells and to identify such a substrate that could  
81 trigger nucleocytoplasmic trafficking perturbation. Our data show that L can recruit both  
82 RSK and FG-NUPs and that FG-NUPs can act as direct RSK substrates in infected cells. This  
83 work provides strong support to the model of the clamp and elucidates a novel virulence  
84 mechanism.

85

86

87

88

## 89 **Results**

90

### 91 **Cardiovirus L-mediated nucleocytoplasmic trafficking perturbation**

#### 92 **depends on RSK recruitment by L**

93 We tested whether L-mediated redistribution of nuclear and cytoplasmic proteins across the  
94 nuclear envelope and the hyperphosphorylation of FG-NUPs depends on both RSK and L. In  
95 agreement with previous reports <sup>14</sup>, cytosolic diffusion of the nuclear protein PTB occurred in  
96 HeLa cells infected for 10 hours with TMEV expressing a wild type L protein (L<sup>WT</sup>) but not  
97 in non-infected cells or in cells infected with viruses carrying the M60V mutation in the C-  
98 terminal part of L (L<sup>M60V</sup>)(Figs 2A and B). In the latter cells, PTB however partly appeared in  
99 cytosolic punctae, likely corresponding to stress granules that were shown to form in the  
100 absence of PKR inhibition by L <sup>12</sup>. Importantly, L<sup>WT</sup>-mediated PTB diffusion was almost  
101 abrogated in RSK-deficient HeLa cells (HeLa-RSK-TKO) (Figs 2B and C). Viral replication  
102 was also decreased in the absence of RSK, in agreement with increased PKR activation in  
103 these cells (Fig 2D). Interestingly, PTB diffusion was restored after transduction of HeLa-  
104 RSK-TKO cells with lentiviruses expressing any of the four human RSK isoforms (Figs 2B  
105 and C). Accordingly, NUP98 hyperphosphorylation was dramatically decreased in HeLa-  
106 RSK-TKO cells and restored in cells transduced to express any of the four RSK isoforms (Fig  
107 2D). Similar observations were made in the case of EMCV as soon as 5 hours post-infection,  
108 although dependence on RSK was less pronounced (Figs 2E-H). Thus, PTB diffusion out of  
109 the nucleus and NUP98 hyperphosphorylation depend on both L and RSK.

110

111 In addition, TMEV and EMCV expressing L<sup>WT</sup> but not mutant L proteins triggered an RSK-  
112 dependent disruption of nucleocytoplasmic trafficking of other proteins harboring canonical

113 nuclear export (NES) and import (NLS) sequences, as shown by diffusion of GFP-NES and  
114 RFP-NLS proteins in live cells that stably express these proteins (Figs 3A-D). This  
115 observation demonstrates that nucleocytoplasmic redistribution of proteins was not specific to  
116 PTB. Again, RSK dependence of protein redistribution was slightly less prominent for  
117 EMCV than for TMEV.  
118 Ectopic expression of TMEV L<sup>WT</sup> but not the L<sup>F48A</sup> mutant (affected in the RSK-binding  
119 motif) was sufficient to trigger nucleocytoplasmic redistribution of proteins (Figs 3E-G).  
120 Also, expression of L<sup>M60V</sup> or YopM did not affect nucleocytoplasmic trafficking although  
121 these proteins can activate RSK<sup>1</sup>. Taken together, these data show that L-mediated  
122 nucleocytoplasmic trafficking alteration does not depend on virus replication per se or on  
123 the expression of other viral proteins and requires both interaction with RSK and, at least for  
124 TMEV L, integrity of the C-terminal part of the protein.

125

## 126 **Identifying RSK partners in TMEV-infected cells using BioID2**

127 According to the model of the clamp, TMEV L would recruit RSK through its central DDVF  
128 motif and would recruit potential RSK substrates through its C-terminal domain. As  
129 suggested above, the M60V mutation of L would prevent the recruitment of such a target,  
130 without affecting RSK binding.

131 In order to identify target proteins that are recruited by L as potential RSK targets, we used  
132 the modified bacterial biotin ligase BioID2 (BioID) which, when fused to a protein of  
133 interest, allows promiscuous biotinylation of proximal proteins in the cell<sup>26</sup>.  
134 A BioID-RSK2 (BioID-RSK) fusion was constructed and expressed in RSK1/2-deficient  
135 HeLa cells (HeLa-RSK-DKO) by lentiviral transduction to identify RSK's potential partners  
136 during TMEV infection (Fig 4A). After testing that the BioID-RSK construct was activated  
137 (i.e. phosphorylated) in the presence of L in infected cells and able to rescue L activities such

138 as L-mediated PKR inhibition (Fig S1A), we performed biotinylation experiments in order to  
139 identify RSK partners in the context of infected cells. HeLa BioID-RSK cells were infected  
140 with either L<sup>WT</sup> or L<sup>M60V</sup> viruses for 16 hours in presence of biotin. Biotinylated proteins  
141 were pulled down using streptavidin beads and processed for mass spectrometry analysis.  
142 Western blot detection of biotinylated proteins (Fig 4B) confirmed the concentration of  
143 biotinylated proteins in the pulled down fraction and revealed the presence of a 100kDa band  
144 specific to the L<sup>WT</sup>-infected sample, suggesting that the L protein status indeed influenced  
145 target biotinylation by the BioID-RSK fusion.

146

### 147 **Identifying L protein partners using BioID**

148 Several attempts to identify proteins that are recruited by TMEV L were made in our lab by  
149 coimmunoprecipitation. However, beside RSK, no clear L partner was consistently identified.  
150 It is not unlikely that proteins recruited by L would interact with L only transiently and with  
151 low affinity. We thus used the BioID system to identify such proteins that may transiently  
152 interact with L in infected cells and then serve as RSK substrates. However, due to packaging  
153 limitations in picornaviruses, the BioID coding sequence (696 nt) would be too long to be  
154 accommodated into the viral genome. We thus generated *trans*-encapsidated replicons where  
155 a sequence coding for BioID-L and eGFP was substituted for the capsid-coding region (Fig  
156 4C). These replicons were encapsidated in 293T cells stably expressing a capsid coding  
157 sequence carrying synonymous mutations in the VP2 region that affect *CRE* function<sup>27</sup> to  
158 prevents the selection of replication-competent wild type viruses that might emerge through  
159 recombination. *Trans*-encapsidated replicons coding for BioID fused to L<sup>WT</sup>, L<sup>M60V</sup> and L<sup>F48A</sup>  
160 were produced (Fig 4A). In HeLa cells infected with these replicons, L activities (i.e. RSK  
161 phosphorylation, PKR activation and NUP98 hyperphosphorylation) were as expected (Fig  
162 S1B). HeLa cells were then infected with BioID-L replicons for 14 hours in presence of

163 biotin. Biotinylated proteins were pulled down in stringent conditions. Western blot  
164 confirmed protein biotinylation in infected cell extracts and showed some bands occurring in  
165  $L^{WT}$  and  $L^{F48A}$  but not in  $L^{M60V}$  samples (Fig 4D). These results confirm specific biotinylation  
166 of proteins by BioID-L.

167

## 168 **FG-NUPs are enriched in BioID-L and BioID-RSK proxomes**

169 We expected that RSK targets recruited by L would be present in both BioID-RSK and  
170 BioID-L screens. Pulled down biotinylated proteins from both screens (n=3 for each screen)  
171 were identified by mass spectrometry (MS) and sorted according to their peptide spectrum  
172 match (PSM) number (for more detail on the calculations see material and methods). For  
173 BioID-RSK, proteins were sorted according to their abundance in  $L^{WT}$ -infected cells relative  
174 to that in non-infected cells and in cells infected with the  $L^{M60V}$  mutant virus (Fig 5A, vertical  
175 axis). For BioID-L (replicons), proteins were sorted according to their abundance in  $L^{WT}$  and  
176  $L^{F48A}$  samples relative to that in  $L^{M60V}$ -infected and in non-infected samples (Fig 5A,  
177 horizontal axis). Hence, the proteins that would be recruited by the C-terminal domain of L  
178 are those that have high ratios in both screens. Interestingly, many of these proteins were FG-  
179 NUPs (Figs 5A and B). ProDA (Probabilistic Dropout Analysis) statistical analysis<sup>28</sup> was  
180 used to identify proteins whose abundance differs in pairwise comparisons:  $L^{WT}$  versus  $L^{M60V}$   
181 for the BioID-RSK experiments, and  $L^{WT}$  versus  $L^{M60V}$  or  $L^{F48A}$  versus  $L^{M60V}$  for the BioID-L  
182 experiment. The table in Fig 5B shows adjusted P-values obtained from this analysis for the  
183 20 best-ranked proteins. In the BioID-RSK experiments, FG-NUPs had the lowest adjusted P-  
184 values (though not significant) and highest fold change (Figs 5B and C). In the BioID-L  
185 experiments many FG-NUPs reached significant scores when pairwise comparisons were  
186 made between  $L^{WT}$  and  $L^{M60V}$  or between  $L^{F48A}$  and  $L^{M60V}$  (Figs 5B and C). Most  
187 importantly, FG-NUPs that had previously been shown to be hyperphosphorylated during



188    cardiovirus infection: NUP62, NUP98, NUP153 and NUP214<sup>17-20</sup> exhibited statistical  
189    significance (Fig 5B). From these results we conclude that L recruits RSK through its DDVF  
190    motif and then docks RSK toward FG-NUPs when the C-terminal domain of L is intact.

191

## 192    **Proteins biotinylated by BioID-RSK and BioID-L are localized at the NPC**

193    We analyzed the subcellular localization of proteins that were biotinylated by BioID-RSK  
194    and by BioID-L in infected cells. To this end, biotinylation experiments were performed as  
195    above but infected cells were fixed after 10h of infection, permeabilized and stained them  
196    with Alexa Fluor conjugated streptavidin. For BioID-RSK, mock-infected cells show staining  
197    of biotinylated proteins in the nucleus, in agreement with the mostly nuclear localization of  
198    RSKs<sup>29</sup> (Figs 6A-C). In cells infected with the L<sup>WT</sup> virus, biotinylated proteins form a faint  
199    rim around the nucleus that colocalizes with the FG-NUP NUP98, in addition to the diffuse  
200    nuclear staining, showing that part of the (BioID)-RSK molecules are recruited to the nuclear  
201    envelope. In cells infected with the L<sup>M60V</sup> mutant virus, this nuclear rim is lost, in agreement  
202    with a lack of L<sup>M60V</sup> interaction with nucleoporins.

203

204    For BioID-L replicons, staining occurs in the nucleus and at the nuclear envelope for L<sup>WT</sup>, in  
205    agreement with an interaction of L with both RSK and NUPs (Figs 7A-C). Proteins  
206    biotinylated by BioID-L<sup>M60V</sup> show diffuse staining in the nucleus, in agreement with L<sup>M60V</sup>  
207    interaction with RSK but not with nucleoporins. Proteins biotinylated by BioID-L<sup>F48A</sup> show  
208    extensive colocalization with nucleoporin POM121 at the nuclear envelope (Fig 7C), in  
209    agreement with the lack of interaction with RSK, which would likely sequester part of the L  
210    protein in the nucleoplasm. In conclusion, labeling of biotinylated proteins support our model  
211    where L interacts with RSK in the nucleus and recruits a portion of RSK molecules to the  
212    NPC, via an interaction between the C-terminal domain of L and NUPs.

213

## 214 **FG-NUPs are direct substrates for RSK in cardiovirus infected cells**

215 Since FG-NUPs are known to be hyperphosphorylated during cardiovirus infection and since  
216 our results showed that RSK is in their close proximity, we aimed to test if RSK can directly  
217 phosphorylate these FG-NUPs in infected cells. For this, we used the « analog-sensitive  
218 kinase system » developed by the group of Shokat<sup>30</sup>. This system is based on the use of an  
219 ATP analog: N6-alkylated ATP- $\gamma$ -S (A\*TP-S), bulkier than ATP, that only fits in ATP  
220 binding pockets of kinases that have been mutated to accommodate such bulkier analogs. The  
221 advantage of this technique is that the mutated kinase (RSK in our case) is the only kinase in  
222 the cell that can use A\*TP-S and will therefore thiophosphorylate its substrates. After  
223 alkylation, such target proteins can be recognized using a specific anti-thiophosphate ester  
224 antibody (Fig 8A). We identified Leu147 as the RSK2 gatekeeper residue (i.e. residue in the  
225 ATP-binding pocket that, when mutated to a smaller residue, allows the access of the A\*TP-  
226 S) by homology to Thr338 in the consensus sequence defined for c-SRC<sup>31</sup> (Fig 8B). Leu147  
227 was mutated either to Gly (As1-RSK) or to Ala (As2-RSK). To test for ATP analog usage by  
228 the modified RSK kinases, WT, As1- and As2-RSKs were stably expressed in HeLa-RSK-  
229 TKO cells by lentiviral transduction, yielding WT-, As1- and As2-RSK cells. Expression of  
230 both As1- and As2-RSK allowed L functions (i.e. PKR inhibition, RSK activation and  
231 NUP98 hyperphosphorylation) (Fig S2A). The ATP analog N6-Bn-ATP- $\gamma$ -S was better  
232 incorporated than N6-PhEt-ATP- $\gamma$ -S by the As-RSKs (Fig S2B). The As2-RSK kinase was  
233 better expressed than As1-RSK and readily accommodated this analog (Figs S2A and B).  
234 Therefore, As2-RSK cells and N6-Bn-ATP- $\gamma$ -S were chosen for further experiments. HeLa  
235 WT-RSK or As2-RSK cells were then infected with L<sup>WT</sup> and L<sup>M60V</sup> viruses for 8h30min.  
236 Cells were then permeabilized with digitonin and treated with A\*TP-S (N6-Bn-ATP- $\gamma$ -S) for  
237 1 hour. Then, NUP98 was immunoprecipitated and its thiophosphorylation status was

238 analyzed, after alkylation, by western blot with the anti-thiophosphate ester antibody. The  
239 blot shown in Fig 8C shows a band highly enriched in the immunoprecipitated sample,  
240 migrating at the expected molecular mass for NUP98 (98kDa). This band was most  
241 prominent in the samples from As2-RSK cells, confirming the specificity of thiophosphate  
242 ester detection. Importantly, this band was detected much more in samples of cells infected  
243 with the L<sup>WT</sup> virus than in samples of cells that were not infected or infected with the L<sup>M60V</sup>  
244 virus. These data indicate that NUP98 can be directly phosphorylated by RSK and that, as  
245 expected, this phosphorylation only occurs after infection with the L<sup>WT</sup> virus. For EMCV, as  
246 this virus replicates much faster than TMEV, NUP98 was immunoprecipitated after 3h30 of  
247 infection. Thiophosphorylation of immunoprecipitated proteins was tested by western blot  
248 using the anti-thiophosphate ester antibody (Fig 8D). As for TMEV, a ~100kDa protein likely  
249 corresponding to NUP98 was thiophosphorylated by As2-RSK only in L<sup>WT</sup> infected  
250 conditions. It is noteworthy that additional bands were detected, which likely correspond to  
251 other FG-NUPs such as NUP62, NUP153 and NUP214 that coimmunoprecipitated with  
252 NUP98.

253 In order to confirm FG-NUPs thiophosphorylation by As2-RSK in infected cells, experiments  
254 were performed the other way around. Therefore, thiophosphorylated proteins were  
255 immunoprecipitated from cells infected with TMEV variants, using the thiophosphate ester  
256 antibody. Then the IP fraction (i.e. thiophosphorylated proteins) was analyzed by western  
257 blot for the presence of NUP98 (Fig 8E) and NUP214 (Fig S2C). Again, these NUPs were  
258 most prominently detected in the conditions where the L protein was WT and RSK was  
259 mutated (As2-RSK). These data confirm that RSK directly phosphorylates FG-NUPs when  
260 the L<sup>WT</sup> protein is present.

261

262 Taken together, these results confirm that part of the cellular RSKs can be redirected to the  
263 nuclear pore complex by the L protein, where RSKs phosphorylate FG-NUPs. By interacting  
264 with RSK through its DDVF motif and with FG-NUPs through its C-terminal domain, L  
265 serves as a viral adapter protein to modulate RSK's activity and redirects these kinases  
266 toward new substrates thus supporting the model of the clamp. Hyperphosphorylation of FG-  
267 NUPs by RSK likely triggers a global perturbation of nucleocytoplasmic trafficking and may  
268 therefore facilitate cytoplasmic replication of coronaviruses.

269

## 270 **Discussion**

271 Recent work showed that some proteins expressed by unrelated viruses and bacteria hijack  
272 host RSK kinases through a conserved DDVF linear motif that likely emerged in those  
273 proteins by convergent evolution <sup>1,2</sup>. Occurrence of the DDVF motif in RHBDF1, a known  
274 target of RSKs suggests that some proteins, either from pathogens or from the host cell, can  
275 associate with RSK through the DDVF motif to promote their own phosphorylation by RSKs  
276 <sup>2</sup>. In the case of TMEV L protein, a point mutation in the C-terminal domain of the protein  
277 (L<sup>M60V</sup>) abrogated L activities although this mutation affected neither L-RSK interaction nor  
278 RSK activation by L <sup>1,32</sup>. The phenotype of this mutant supported the model of the clamp  
279 where the pathogens' protein would act to bridge RSK to specific substrates. The two models  
280 are not mutually exclusive.

281 Our data show that L proteins from TMEV and EMCV indeed act by redirecting part of the  
282 cellular RSK kinases toward the nuclear pore complex where RSKs directly phosphorylate  
283 FG-NUPs.

284 Bacteria of the genus *Yersinia* use a type III secretion system to inject Yop proteins into  
285 contacted eukaryotic cells <sup>33</sup>. YopM was shown to interact with RSK through a C-terminal

286 DDVF motif<sup>1</sup> and with protein kinase PKNs through central leucine-rich motifs. Formation of  
287 the tripartite (YopM-RSK-PKN) complex results in the phosphorylation and activation of  
288 PKN, which requires active RSK<sup>34,35</sup>, suggesting that RSK might also be redirected toward  
289 PKN as a specific substrate. This scenario is very likely although direct phosphorylation of  
290 PKN by RSK was not formally proven.

291 Another question regarding the clamp model is whether the substrates to which RSKs are  
292 redirected by the pathogens' proteins are physiological RSK substrates, the phosphorylation  
293 of which is increased by their forced association with RSKs or whether they represent  
294 unconventional RSK substrates. From the blots of analog-sensitive RSK experiments (Figs  
295 8C-E and S2C), it appears that basal thiophosphorylation of NUP98 or NUP214 might occur,  
296 even in non-infected cells that do not contain the L protein. Also, given that the main binding  
297 site of pathogens' proteins is located in a surface-exposed loop of RSK, relatively remote  
298 from the catalytic site, it is unlikely that this interaction can modify the catalytic site enough  
299 to accommodate structurally divergent substrates. Thus, the role of the bridging proteins is  
300 likely to increase the frequency of encounters between RSKs and specific substrates, and  
301 possibly also to drive these kinases to specific subcellular locations.

302 Viruses of the *Picornaviridae* family disturb nucleocytoplasmic traffic, likely to recruit host  
303 nuclear RNA-binding proteins to the cytoplasm of the infected cells, where their genome  
304 translation and replication takes place. Perturbation of the traffic was also reported to inhibit  
305 the activation of innate immunity genes such as genes coding for interferon or chemokines,  
306 because these genes rely on the translocation of transcription factors like IRF3/7 or NFκB  
307<sup>16,36</sup>. Enteroviruses encode proteases 2A<sup>pro</sup> and 3C<sup>pro</sup>, which directly cleave FG-NUPs<sup>37</sup>,  
308 thereby opening the central channel of the nuclear pore complex<sup>20,38</sup>. Cardioviruses,  
309 however, induce the hyperphosphorylation of FG-NUPs, thus mimicking a process occurring  
310 during mitosis, which ends up in the dismantling of the NPCs and the free diffusion of

311 nuclear and cytoplasmic proteins. Here, we show that TMEV L promotes direct FG-NUPs  
312 phosphorylation by RSKs. During mitosis, FG-NUP phosphorylation was proposed to  
313 involve mostly cyclin-dependent kinase 1 (CDK1), polo-like kinase 1 (PLK1) and NIMA-  
314 related kinases<sup>23,39</sup>. A phosphoproteomic analysis by Kosako et al.<sup>40</sup> also suggested the  
315 involvement of the ERK pathway, ERK1/2 being the upstream kinase of RSK. We  
316 hypothesize that RSKs might indeed contribute, to some extent, to NUP phosphorylation  
317 during mitosis and that L triggers a stronger RSK-mediated FG-NUP phosphorylation during  
318 infection.

319 Our work illustrates a new virulence mechanism whereby pathogens' proteins not only  
320 activate but also redirect host kinases toward specific substrates and decipher how  
321 cardioviruses trigger RSK-mediated FG-NUP hyperphosphorylation to perturb  
322 nucleocytoplasmic trafficking in the host cell.

323

## 324 **Material & methods**

325

### 326 **Cells**

327 The subclone of HeLa cells used in this work were HeLa M cells kindly offered by R.H.

328 Silvermann<sup>41</sup>.

329 HeLa-RSK-DKO, (RSK1- and RSK2-deficient) and HeLa-RSK-TKO (RSK-1, RSK2- and  
330 RSK3-deficient) cells were obtained from HeLa M cells using the CRISPR-Cas9 technology

331 <sup>1</sup>. HeLa-LVX and HeLa-RSK-TKO-LVX were obtained by transduction of HeLa M cells and  
332 of HeLa-RSK-TKO cells with pLVX-EF1alpha-2xGFP:NES-IRES-2xRFP:NLS. Clones  
333 showing regular 2xGFP:NES and 2xRFP:NLS expression levels under the fluorescent  
334 microscope were selected for further use. HeLa BioID-RSK cells were obtained by

335 transduction of HeLa-RSK-DKO cells with BLP10 and transduced cell populations were then  
336 selected with 1mg/ml of G418 (Roche). HeLa WT-RSK, HeLa As1-RSK and HeLa As2-RSK  
337 cells were obtained by transduction of HeLa-RSK-TKO cells with TM1117, BLP20 and  
338 BLP21 respectively and transduced cell populations were selected with 1mg/ml of G418  
339 (Roche).  
340 HeLa-RSK-TKO cells were transduced with the empty lentiviral vector TM952 or with  
341 TM1116-19 derivatives expressing the four isoforms of human RSK. Transduced cell  
342 populations were selected with 2mg/ml of G418.  
343 BHK-CL13 and 293T-CL13 cells were obtained by lentiviral transduction of CL13.  
344 mCherry-positive cells were then sorted by FACS.  
345 293T cells were kindly provided by F. Tangy (Pasteur Institute, Paris). Both HeLa M and  
346 293T cells and their derivatives were maintained in Dulbecco's modified Eagle medium  
347 (DMEM) (Lonza) supplemented with 10% of fetal calf serum (FBS, Sigma), 100 U/ml  
348 penicillin and 100µg/ml streptomycin (Thermo Fisher). BHK-21 cells (ATCC), were  
349 maintained in Glasgow's modified Eagle medium (GMEM) (Gibco) supplemented with 10%  
350 newborn calf serum (Gibco), 100 U/ml penicillin, 100µg/ml streptomycin and 2.6g/l tryptose  
351 phosphate broth (Difco). All cells were cultured at 37°C, in 5% CO<sub>2</sub>.

352

### 353 **Viruses**

354 TMEV viruses used in this study are derivatives of KJ6, a variant of the persistent DA strain  
355 (DA1 molecular clone) adapted to grow on L929 cells<sup>42</sup>. FB09 carries the M60V mutation in  
356 L (L<sup>M60V</sup>), which was shown to abrogate L toxicity<sup>12,32</sup>. KJ6 and FB09 are indicated as  
357 TMEV L<sup>WT</sup> and L<sup>M60V</sup> respectively.  
358 EMCV viruses used in this study are derived from pMC24, a Mengo virus molecular clone  
359 carrying a shortened (24C) polyC tract<sup>43</sup>. The virus denoted EMCV<sup>WT</sup> (used in Fig 8) is the

360 virus produced from the pMC24 plasmid. Viruses denoted EMCV L<sup>WT</sup> and L<sup>Zn</sup> (used in Figs  
361 2 and 3) are produced from plasmids pFS269 and pTM1098 and express N-terminally Flag-  
362 tagged L proteins. L<sup>Zn</sup> carries two point mutations (C19A and C22A) in the zinc finger of L,  
363 which likely affect the overall structure of the protein <sup>44</sup>.

364 These viruses were produced by reverse genetics from plasmid constructions containing the  
365 full-length viral cDNA sequences. To this end, BHK-21 cells were electroporated (1500V,  
366 25μF, no shunt resistance) using a Gene pulser apparatus (Bio-Rad) with viral RNA  
367 produced by *in vitro* transcription (RiboMax P1300, Promega). Supernatants were collected  
368 48-72h after electroporation, when cytopathic effect was complete. After 2 to 3 freeze-thaw  
369 cycles, the supernatants containing the virus were clarified by centrifugation at 1258g for 20  
370 min and viruses were stored at -80°C. Viruses were titrated by plaque assay in BHK-21 cells.

371

### 372 **Trans-encapsidated viral replicons**

373 FW12 is the replicon encoding for BioID2-HA-linker(3xGGGGS)-L<sup>WT</sup>. This replicon derives  
374 from TMEV DA1. It was constructed by replacing the capsid-coding region of the virus by a  
375 sequence coding sequentially (5'-to-3'), in a single frame, for: BioID2-HA-  
376 linker(3xGGGGS)-L, the L/VP4 boundary cleaved by protease 3C, eGFP, the VP2 coding  
377 segment encompassing the CRE sequence, the 3' end of the 2A coding region and the  
378 following part of the viral genome (see Fig 4). The BioID-L<sup>M60V</sup> (FW16) and BioID-L<sup>F48A</sup>  
379 (FW17) viral replicons are derivatives of FW12 carrying the indicated mutation. Trans-  
380 encapsidation of the replicon occurred in 293T-CL13 to stably express the viral capsid  
381 precursor protein. C-terminal residues of L were inserted in the construct to restore a genuine  
382 L/VP4 cleavage site for protease 3C, which allows the capsid protein to start with an N-  
383 terminal glycine, potentially undergoing myristoylation <sup>45</sup>. Importantly, 4 silent mutations  
384 were introduced in the VP2 coding sequence corresponding to the *CRE* region to prevent the



385 replication of recombinant wild type viruses that would emerge through recombination  
386 between replicon RNA and capsid-coding mRNA in packaging cells.  
387 293T-CL13 cells were seeded (600,000/well) in 6-well plates. 24h after seeding, cells were  
388 transfected (TransIT-mRNA, Mirus) with 5µg of replicon RNA previously obtained by *in*  
389 *vitro* transcription. Six hours post-transfection, medium was changed to DMEM without  
390 serum. The infected cells were passaged 8 times and reseeded with part of the collected  
391 supernatant to amplify viral production. Then, 150ml of replicon-containing supernatant was  
392 collected and filtered (0.45µm). SDS was then added to a final concentration of 0.5% and,  
393 after 2h incubation at RT, supernatants were centrifuged for 5min, at 1258g at 20°C. Next,  
394 13ml of clarified supernatant was added to a 2.6ml sucrose 30% cushion in polyallomer tubes  
395 (Beckman) and centrifuged for 16h at 20°C, 25000rpm in a SW28 swinging bucket rotor.  
396 After ultracentrifugation, pellets containing the replicons were resuspended in 150µl of  
397 10mM Tris-HCl pH 7.5 and further dialyzed in 10mM Tris-HCl pH 7.5. Replicons were then  
398 titrated by plaque assay using BHK-21 cells stably expressing viral capsid proteins (BHK-21  
399 CL13), and kept at -80°C.

400

#### 401 **Lentiviral vectors and cell transduction**

402 - pLVX-EF1alpha-2xGFP:NES-IRES-2xRFP:NLS was a gift from Fred Gage (Addgene  
403 plasmid # 71396) <sup>46</sup>

404 Other lentiviral vectors used for protein expression were derived from  
405 pCCLsin.PPT.hPGK.GFP.pre. <sup>47</sup>

406 - TM945 is a Prom<sub>CMV</sub>-MCS-IRES-mCherry construct <sup>48</sup>

407 - TM952 is a Prom<sub>CMV</sub>-MCS-IRES-neo construct <sup>49</sup>

408 - BLP10 is a TM952 derivative coding for BioID2-HA-linker(3xGGGS)-MuRSK2. This  
409 construct expresses murine RSK2, which differs from human RSK2 by a single amino acid.

410 - BLP20 is a TM952 derivative coding for As1-RSK2 (hu-RSK2 with Analog-sensitive  
411 kinase 1 (As1) mutation (Leu 147 → Gly ).  
412 - BLP21 is a TM952 derivative coding for As2-RSK2 (hu-RSK2 with Analog-sensitive  
413 kinase 2 (As2) mutation (Leu 147 → Ala ).  
414 - CL13 is a TM945 derivative expressing the 10 C-terminal aminoacids of L followed by the  
415 entire capsid precursor of virus DA1.  
416 - TM1116, TM1117, TM1118 and TM1119 are TM952 derivatives carrying the sequences  
417 coding for 3xHA-Human RSK1, RSK2, RSK3 and RSK4 respectively <sup>1</sup>. They were  
418 constructed using the Gateway technology (Invitrogen) from donor plasmids Hs.RPS6KA1,  
419 Hs.RPS6KA2, Hs.RPS6KA3 and Hs.RPS6KA6 kindly provided by Dominic Esposito  
420 through the Addgene collection (Addgene refs: 70573, 70575, 70577, and 70579,  
421 respectively)  
422 Lentiviruses were produced in 293T cells by co-transfection of the following plasmid, using  
423 TransIT-LT1 reagent (Mirus Bio): 2.5 µg of lentiviral vector, 0.75 µg of pMD2-VSV-G  
424 (VSV-glycoprotein), 1.125 µg of pMDLg/pRRE (Gag-Pol), and 0.625 µg of pRSV-Rev  
425 (Rev). DNA quantities are for transfection of 1 well of a 6-well plate. Supernatants were  
426 typically collected 72h post transfection and filtered (porosity: 0.45µM). For transduction,  
427 cells were typically seeded in a 24-well plate as of 5,000 - 10,000 cells/well and infected 1 or  
428 2 times with 100µL of filtered lentivirus.

429

### 430 **Biotinylation experiments**

431 BioID-RSK: HeLa BioID-RSK cells were seeded in 6-well plates at a density of 90,000 cells  
432 per well. Two 6-well plates were used per condition. 24h after seeding the cells, the medium  
433 was changed to OptiMEM (Gibco) depleted from biotin (previously incubated with  
434 streptavidin beads for 2h at 4°C, then filtered). Cells were kept in OptiMEM without biotin

435 for 48h, then they were infected with 600 $\mu$ l of virus per well at an MOI of 2.5. One hour  
436 post-infection 2ml/well of DMEM containing 5 $\mu$ M biotin was added. Infection proceeded for  
437 16h. For immunostaining, same protocol with these differences: 1,000 HeLa BioID-RSK  
438 cells were seeded in wells of a 96-well plate. Cells were infected with 50 $\mu$ L of virus per well  
439 at an MOI of 5 and infection proceeded for 10h.

440 BioID-L: HeLa cells were seeded in 6-well plates as of 160,000 cells per well. Two 6-well  
441 plates were used per condition. 24h after seeding, the cells were infected with 600 $\mu$ l of  
442 BioID-L replicons at an MOI of 2.5. One hour post-infection 2ml/well of DMEM containing  
443 5 $\mu$ M biotin was added. Infection proceeded for 14h. For immunostaining, same protocol with  
444 these differences: 3,500 HeLa cells were seeded in wells of a 96-well plate. Cells were  
445 infected with 50 $\mu$ L of virus per well at an MOI of 5 and infection proceeded for 10h.

446

#### 447 **Streptavidin Pulldown**

448 Cells were washed with PBS 3 times and lysed with 200 $\mu$ L/well of stringent lysis buffer  
449 (50mM Tris-HCl pH 7.6, 500mM NaCl, 0.4% SDS, 1mM DTT, 1 tablet of Pierce  
450 phosphatase/protease inhibitor (Thermo Scientific) per 10ml of lysis buffer) for 15 min at  
451 room temperature (RT). Lysates were then diluted twice by addition of 200 $\mu$ l/well of 50mM  
452 Tris-HCl pH7.6 and homogenized by 10 passages through 21G needles. Lysates were then  
453 cleared by centrifugation at 12,000g for 10 min at RT. Supernatants were transferred to new  
454 tubes, 200 $\mu$ L (per condition) of protein A/G magnetic beads (Pierce) were added to remove  
455 non-specific binding and incubated for 30 min at RT. Supernatants were then transferred to a  
456 new tube and a sample of 160 $\mu$ L per condition was mixed with 80 $\mu$ L of 3x Laemmli buffer  
457 (cell lysate control). The rest of the supernatant was incubated for 2h at RT with 260 $\mu$ L (per  
458 condition) of Streptavidin magnetic beads (Pierce). Streptavidin beads were then washed  
459 once with 2% SDS, and twice with “normal lysis buffer” (50mM Tris-HCl pH 7.5, 100mM

460 NaCl, 2mM EDTA, 0.5% NP40, 1 tablet of phosphatase/protease inhibitor (Thermo  
461 Scientific) per 10ml of lysis buffer) for 5 min at RT. Beads were resuspended in 40µl of 1x  
462 Laemmli buffer and heated for 5min at 100°C to allow protein's separation from the beads.  
463 Supernatants were then conserved at -20°C.

464

## 465 Immunostaining

466 Immunostaining was performed as described previously <sup>49</sup>

| Antibody                              | Dilution | Reference                   |
|---------------------------------------|----------|-----------------------------|
| Anti-TMEV 3D polymerase (rabbit)      | 1/1000   | kindly provided by M.Brahic |
| Anti-2A (rabbit)                      | 1/1200   | Home-made                   |
| Anti-NUP98 (rat)                      | 1/400    | N1038 - Sigma               |
| Anti-POM121 (rabbit)                  | 1/400    | 15645-1-AP - Proteintech    |
| Anti-PTB (mouse)                      | 1/400    | 324800 - Invitrogen         |
|                                       |          |                             |
| Anti-rabbit Alexa Fluor 594 (chicken) | 1/800    | A21442 - Molecular Probes   |
| Anti-rabbit Alexa Fluor 488 (Goat)    | 1/800    | A11008 - Molecular Probes   |
| Anti-rat Alexa Fluor 594 (chicken)    | 1/800    | A21471 - Molecular Probes   |
| Anti-mouse Alexa Fluor 488 (Goat)     | 1/400    | A11029 - Molecular Probes   |
| Streptavidin Alexa Fluor 488          | 1/500    | S32354 - Invitrogen         |
| Streptavidin Alexa Fluor 594          | 1/500    | S32356 - Invitrogen         |

467

## 468 Western blotting

469 Western blots were performed as described previously <sup>49</sup>

| Antibody | Dilution | Reference |
|----------|----------|-----------|
|----------|----------|-----------|

|                                                   |         |                             |
|---------------------------------------------------|---------|-----------------------------|
| Anti-2A (rabbit)                                  | 1/4000  | Home-made                   |
| Anti-Phospho-S380-RSK (rabbit)                    | 1/4000  | CST11989                    |
| anti-PKR (rabbit)                                 | 1/4000  | 18244-1-AP                  |
| anti-Phospho-T446-PKR (rabbit)                    | 1/4000  | AB32036                     |
| anti- $\beta$ -actin (mouse)                      | 1/10000 | A5441- Sigma                |
| anti-TMEV 3D polymerase (rabbit)                  | 1/2000  | kindly provided by M.Brahic |
| anti-NUP98 (rat)                                  | 1/2000  | N1038 - Sigma               |
| anti-HA (mouse)                                   | 1/4000  | MMS101P - Covance           |
| anti-phospho-Akt/RSK-substrates:RxxS*/T* (rabbit) | 1/1000  | CST9614                     |
| anti-thio-P-ester (rabbit)                        | 1/1000  | NBP2-67738                  |
| anti-TMEV capsid (mouse)                          | 1/2000  | Home-made                   |
| anti-FLAG M2                                      | 1/5000  | F1804 - Sigma               |
|                                                   |         |                             |
| Anti-rabbit-HRP (Goat)                            | 1/5000  | P0448 – Dako                |
| Anti-mouse-HRP (Goat)                             | 1/5000  | P0447 – Dako                |
| Anti-rat-HRP (Rabbit)                             | 1/5000  | P0162 – Dako                |
| Streptavidin-HRP                                  | 1/5000  | P0397 – Dako                |

470

471

## 472 **Mass spectrometry**

473 Mass spectrometry analysis was performed as described previously<sup>50,51</sup>. Streptavidin

474 pulldown samples were resolved using a 10% Tris-Glycine SDS gel run until 6mm migration

475 in the separating gel. Proteins were colored using PageBlue (Thermo Scientific, 24620). The

476 6mm bands containing whole proteins were cut into 3 different slices and trypsin digested (50

477 ng/μl in 50 mM NH<sub>4</sub>HCO<sub>3</sub> buffer, pH 8.0). The peptides were analyzed by capillary LC-  
478 tandem mass spectrometry using an Orbitrap Fusion Lumos tribrid ion trap mass  
479 spectrometer (ThermoFisher Scientific). The resulting MS/MS data was processed using  
480 Sequest HT search engine within Proteome Discoverer 2.5 SP1 against a *Homo Sapiens*  
481 protein database obtained from Uniprot (78 787 entries) and containing the sequences of viral  
482 proteins and BioID2-RSK. Trypsin was specified as cleavage enzyme allowing up to 2  
483 missed cleavages, 4 modifications per peptide and up to 5 charges. Mass error was set to 10  
484 ppm for precursor ions and 0.1 Da for fragment ions. Oxidation on Met (+15.995 Da),  
485 phosphorylation on Ser, Thr and Tyr (+79.966 Da), conversion of Gln (-17.027 Da) or Glu (-  
486 18.011 Da) to pyro-Glu at the peptide N-term, biotinylation of Lys (+ 226.077) were  
487 considered as variable modifications. False discovery rate (FDR) was assessed using  
488 Percolator and thresholds for protein, peptide and modification site were specified at 1%.  
489 PSM Ratio calculations were as followed:

$$490 \text{ BioID} - \text{RSK}: \frac{PSM(L^{WT})}{PSM(L^{M60V}) + PSM(\text{mock}) + 1} \quad \text{BioID} - L: \frac{PSM(L^{WT}) + PSM(L^{F48A})}{PSM(L^{M60V}) + PSM(\text{mock}) + 1}$$

491

#### 492 ***In vitro* kinase assay**

493 293T cells were seeded (500,000 cells/well) in 6-well plates. 24h after seeding, cells were  
494 transfected with TransIT-LT1 reagent (Mirus Bio) with 2.5 μg of plasmids pTM1117,  
495 pBLP20 and pBLP21. 6 hours post-transfection, cells were treated with 32nM PMA over-  
496 night. HA-RSKs were then immunoprecipitated with anti-HA magnetic beads and  
497 resuspended in 30μl of TBS, 1mM PMSF, 1mM Na<sub>3</sub>VO<sub>4</sub>, 1 tablet of phosphatase/protease  
498 inhibitor (Thermo Scientific) per 10ml.

499 For one *in vitro* kinase reaction we put: 2.5μg of GST-S6 (recombinant substrate), 10μL of  
500 kinase buffer 5x (125mM Hepes pH 7.5, 250mM NaCl, 100mM β-glycerophosphate, 5mM  
501 DTT, 100mM MgCl<sub>2</sub>, 500μM Na<sub>3</sub>VO<sub>4</sub>), 0.5 μL of 10mM ATP (Roth, HN35.1) or A\*TP

502 analogs (BioLog), and water to a final volume of 30 $\mu$ L. To this we added 10 $\mu$ L of the  
503 immunoprecipitated RSK and incubated everything at 30°C for 30 min with shaking.  
504 Following this, the samples were alkylated with PNBM (Abcam) at a final concentration of  
505 2.5mM for 2 hours at room temperature with shaking. Reaction was stopped by the addition  
506 of Laemmli buffer 3x. Samples were then heated at 100°C for 5 min, separated from the  
507 magnetic beads and kept at -20°C.

508

### 509 **Thiophosphorylation in permeabilized cells**

510 1.5 x10<sup>6</sup> HeLa-RSK-TKO TM1117 or BLP21 cells were seeded in 10-cm dishes, 1 dish per  
511 condition. The next day, cells were infected at an MOI of 5 for 8h30min (for TMEV) and  
512 3h30min (for EMCV). After that, cells were permeabilized with 500 $\mu$ L of the analog-kinase  
513 buffer: 20mM HEPES pH 7.5, 100mM KOAc, 5mM NaOAc, 2mM MgOAc<sub>2</sub>, 1mM EGTA,  
514 20 $\mu$ g/ml digitonin, 10mM MgCl<sub>2</sub>, 0.5mM DTT, 1x phosphatase inhibitor cocktail 2 (P5726,  
515 Merck), 1x cOmplete protease inhibitor (REF), 57 $\mu$ g/ml creatin kinase (Calbiochem 23895),  
516 5mM Creatin phosphate (Calbiochem, 2380), 0.1mM ATP, 0.1 mM N6-Bn-A\*TP analog  
517 (BioLog), 3mM GTP (Roth, K056.4) in order to get the ATP analog inside the cells and the  
518 thiophosphorylation reaction to happen. Reaction proceeded for 1h at 37°C, 5% CO<sub>2</sub> with the  
519 dishes on a rocking plate.

520

### 521 **Immunoprecipitation after thiophosphorylation reactions.**

522 NUP98 IP: cells were lysed by adding 500 $\mu$ L of 2x salty lysis buffer (100mM Tris-HCl pH8,  
523 800mM NaCl, 2% Triton X-100, 4mM EDTA, 2mM DTT, 1 tablet of phosphatase/protease  
524 inhibitor (Thermo Scientific) per 10ml of lysis buffer) to the analog-kinase buffer for 15 min  
525 at 4°C. Lysates were diluted 4x by addition of 3ml of regular lysis buffer (50mM Tris-HCl  
526 pH8, 100mM NaCl, 0.5% NP40, 2mM EDTA, 1 tablet of phosphatase/protease inhibitor

527 (Thermo Scientific) per 10ml of lysis buffer). Lysates were then homogenized by 10 passages  
528 through 21G needles and cleared by centrifugation at 12,000g for 10min at 4°C. Supernatants  
529 were then transferred to new tubes, 30µL (per condition) of protein A/G magnetic beads  
530 (Pierce) were added to remove non-specific binding and incubated for 30 min at 4°C.  
531 Supernatants were then transferred to a new tube and a sample of 200µL/ condition was  
532 alkylated with PNBM at a final concentration of 2.5mM for 2h at RT. Alkylation reaction was  
533 stopped by addition of 3x Laemmli buffer (cell lysate control). The rest of the supernatant  
534 was incubated O/N at 4°C with 8µg (per condition) of anti- NUP98 (rat, N1038 – Sigma).  
535 62.5µl of A/G beads per condition were added and incubated for 2h at 4°C. A/G beads were  
536 then washed three times with regular lysis buffer for 5 min at 4°C. Beads were resuspended  
537 in 40µl of kinase buffer 1x. The IP samples were then alkylated with PNBM at a final  
538 concentration of 2.5mM for 2h at RT. Alkylation reaction was stopped by the addition of 3x  
539 Laemmli, and immunoprecipitated proteins were separated from the beads after heating 5min  
540 at 100°C.

541 Thiophosphate ester IP: cells were lysed by adding 500µL of 2x lysis buffer (100mM Tris-  
542 HCl pH8, 200mM NaCl, 1% NP40, 40mM EDTA, 1 tablet of phosphatase/protease inhibitor  
543 (Thermo Scientific) per 10ml of lysis buffer) for 15min at 4°C. Lysates were then  
544 homogenized by 10 passages through 21G needles and cleared by centrifugation at 12,000g  
545 for 10min at 4°C. Supernatants were then alkylated with PNBM at a final concentration of  
546 2.5mM for 1h30min at RT. As PNBM inhibits immunoprecipitation, lysates were run through  
547 PD10 columns to remove PNBM prior to the immunoprecipitation procedure. Fractions  
548 containing protein were kept and incubated with 30µl per condition of A/G magnetic beads  
549 (to avoid non-specific binding) for 30 min at 4°C. Supernatants were then transferred to a  
550 new tube and 1/10th of the lysate (200µl) was mixed with 100µl of 3x Laemmli (cell lysate  
551 control). The rest of the supernatant was incubated with 8µg per condition of anti-



552 thiophosphate ester antibody (rabbit, NBP2-67738 – Novusbio) for 2h at 4°C. Then 62.5µl  
553 per condition of A/G magnetic beads were added and incubated for 2h at 4°C. A/G beads  
554 were then washed three times with regular lysis buffer for 5 min at 4°C and resuspended in  
555 60µl of Laemmli 1x. Immunoprecipitated proteins were separated from the beads after  
556 heating 5min at 100°C.

557

### 558 **Data processing and statistical analysis (for MS)**

559 Protein identification and label-free quantitation were performed with MaxQuant version  
560 1.6.7.0.<sup>52</sup>. Database searching was performed against the UniProt FASTA database, using a  
561 false-discovery rate at the peptide and protein level was set to 0.01 and allowing a maximum  
562 of two missed cleavages. All search parameters are available in the parameter file available in  
563 the study repository (<https://github.com/UCLouvain-CBIO/2022-RSK-Nups-VIRO>). After  
564 filtering out of identified contaminants, identified reverse sequences and proteins having  
565 missing values in all samples, Max Quant protein intensities were log-2 transformed and  
566 normalized using sample median alignment. In order to cope with the numerous drop-outs in  
567 protein intensities, the proDA method, as described in <sup>28</sup> was applied.

568 For the analysis of the BioID-L experiment, the backbone linear model included one indicator  
569 variable representing a potential batch effect between 2 groups of replicates, and 2 condition  
570 indicator variables, representing the effect of resp. WT and F48A conditions with respect to  
571 the reference condition, i.e. M60V condition. Potential batch effect was tested for each  
572 protein using two-sided Wald test on the batch indicator variable. Since adjusted p-values  
573 were > 0.2 for all proteins, this indicator variable was subsequently removed from the model.  
574 Then, the effects of WT and F48 conditions (w.r.t. M60V) were tested, for each protein,  
575 using one-sided Wald tests, since the anticipated sign of the effect was known. All p-values  
576 were adjusted using Benjamini-Hochberg corrections <sup>53</sup>.

577 For the analysis of the BioID-RSK experiment, the backbone linear model included one  
578 indicator variable representing a potential batch effect between 2 groups of replicates, and 1  
579 condition indicator variable, representing the effect of WT condition with respect to the  
580 reference condition, i.e. M60V condition. Potential batch effect was tested for each protein  
581 using two-sided Wald test on the batch indicator variable. Since adjusted p-values were  $> 0.6$   
582 for all proteins, this indicator variable was subsequently removed from the model. Then, the  
583 effect of WT condition (w.r.t. M60V) was tested, for each protein, using a one-sided Wald  
584 test, since the anticipated sign of the effect was known. All p-values were adjusted using  
585 Benjaminin-Hochberg corrections.

586

#### 587 **Statistical analysis on immunofluorescence**

588 Statistical analysis on immunofluorescence experiments was done using GraphPad Prism v9  
589 A one-way ANOVA test was used. The number of independent experiments (n) and  
590 statistical comparison groups are indicated in the Figures and Figure legends.

591

#### 592 **Materials & Correspondence**

593 Further information and requests for resources and reagents should be directed to and will be  
594 fulfilled by the lead contact, Thomas Michiels ([thomas.michiels@uclouvain.be](mailto:thomas.michiels@uclouvain.be)). All reagents  
595 generated in this study are available upon request after completion of a Materials Transfer  
596 Agreement

597

#### 598 **Data and code availability**

599 The mass spectrometry proteomics data have been deposited to the ProteomeXchange  
600 Consortium via the PRIDE partner repository with the dataset identifier PXD034604".

601 MaxQuant outputs are available in the study repository <https://github.com/UCLouvain->  
602 CBIO/2022-RSK-Nups-VIRO  
603 Codes: Processed data and reproducible proDA analyses scripts are available in the study  
604 repository at <https://github.com/UCLouvain-CBIO/2022-RSK-Nups-VIRO>

## 605 References

- 606 1 Sorgeloos, F. *et al.* A case of convergent evolution: Several viral and bacterial  
607 pathogens hijack RSK kinases through a common linear motif. *Proc Natl Acad Sci U S*  
608 *A* **119** (2022). <https://doi.org/10.1073/pnas.2114647119>  
609 2 Alexa, A. *et al.* A non-catalytic herpesviral protein reconfigures ERK-RSK signaling  
610 by targeting kinase docking systems in the host. *Nat Commun* **13**, 472 (2022).  
611 <https://doi.org/10.1038/s41467-022-28109-x>  
612 3 Chung, L. K. *et al.* The Yersinia Virulence Factor YopM Hijacks Host Kinases to  
613 Inhibit Type III Effector-Triggered Activation of the Pyrin Inflammasome. *Cell Host*  
614 *Microbe* **20**, 296-306 (2016). <https://doi.org/10.1016/j.chom.2016.07.018>  
615 4 Ratner, D. *et al.* The Yersinia pestis Effector YopM Inhibits Pyrin Inflammasome  
616 Activation. *PLoS Pathog* **12**, e1006035 (2016).  
617 <https://doi.org/10.1371/journal.ppat.1006035>  
618 5 Kuang, E., Fu, B., Liang, Q., Myoung, J. & Zhu, F. Phosphorylation of eukaryotic  
619 translation initiation factor 4B (EIF4B) by open reading frame 45/p90 ribosomal S6  
620 kinase (ORF45/RSK) signaling axis facilitates protein translation during Kaposi  
621 sarcoma-associated herpesvirus (KSHV) lytic replication. *J Biol Chem* **286**, 41171-  
622 41182 (2011). <https://doi.org/10.1074/jbc.M111.280982>  
623 6 Li, X. *et al.* ORF45-Mediated Prolonged c-Fos Accumulation Accelerates Viral  
624 Transcription during the Late Stage of Lytic Replication of Kaposi's Sarcoma-  
625 Associated Herpesvirus. *J Virol* **89**, 6895-6906 (2015).  
626 <https://doi.org/10.1128/jvi.00274-15>  
627 7 Freundt, E. C., Drappier, M. & Michiels, T. Innate Immune Detection of Cardioviruses  
628 and Viral Disruption of Interferon Signaling. *Front Microbiol* **9**, 2448 (2018).  
629 <https://doi.org/10.3389/fmicb.2018.02448>  
630 8 Brahic, M., Bureau, J. F. & Michiels, T. The genetics of the persistent infection and  
631 demyelinating disease caused by Theiler's virus. *Annu Rev Microbiol* **59**, 279-298  
632 (2005). <https://doi.org/10.1146/annurev.micro.59.030804.121242>  
633 9 van Pesch, V., van Eyll, O. & Michiels, T. The leader protein of Theiler's virus inhibits  
634 immediate-early alpha/beta interferon production. *J Virol* **75**, 7811-7817 (2001).  
635 <https://doi.org/10.1128/jvi.75.17.7811-7817.2001>  
636 10 Zoll, J., Melchers, W. J., Galama, J. M. & van Kuppeveld, F. J. The mengovirus leader  
637 protein suppresses alpha/beta interferon production by inhibition of the iron/ferritin-  
638 mediated activation of NF-kappa B. *J Virol* **76**, 9664-9672 (2002).  
639 <https://doi.org/10.1128/jvi.76.19.9664-9672.2002>  
640 11 Hato, S. V. *et al.* The mengovirus leader protein blocks interferon-alpha/beta gene  
641 transcription and inhibits activation of interferon regulatory factor 3. *Cell Microbiol* **9**,  
642 2921-2930 (2007). <https://doi.org/10.1111/j.1462-5822.2007.01006.x>

- 643 12 Borghese, F. & Michiels, T. The leader protein of cardioviruses inhibits stress granule  
644 assembly. *J Virol* **85**, 9614-9622 (2011). [https://doi.org:10.1128/jvi.00480-11](https://doi.org/10.1128/jvi.00480-11)
- 645 13 Borghese, F., Sorgeloos, F., Cesaro, T. & Michiels, T. The Leader Protein of Theiler's  
646 Virus Prevents the Activation of PKR. *J Virol* **93** (2019).  
647 [https://doi.org:10.1128/jvi.01010-19](https://doi.org/10.1128/jvi.01010-19)
- 648 14 Delhaye, S., van Pesch, V. & Michiels, T. The leader protein of Theiler's virus interferes  
649 with nucleocytoplasmic trafficking of cellular proteins. *J Virol* **78**, 4357-4362 (2004).  
650 [https://doi.org:10.1128/jvi.78.8.4357-4362.2004](https://doi.org/10.1128/jvi.78.8.4357-4362.2004)
- 651 15 Lidsky, P. V. *et al.* Nucleocytoplasmic traffic disorder induced by cardioviruses. *J Virol*  
652 **80**, 2705-2717 (2006). [https://doi.org:10.1128/jvi.80.6.2705-2717.2006](https://doi.org/10.1128/jvi.80.6.2705-2717.2006)
- 653 16 Lizcano-Perret, B. & Michiels, T. Nucleocytoplasmic Trafficking Perturbation Induced  
654 by Picornaviruses. *Viruses* **13**, 1210 (2021).
- 655 17 Porter, F. W. & Palmenberg, A. C. Leader-induced phosphorylation of nucleoporins  
656 correlates with nuclear trafficking inhibition by cardioviruses. *J Virol* **83**, 1941-1951  
657 (2009). [https://doi.org:10.1128/jvi.01752-08](https://doi.org/10.1128/jvi.01752-08)
- 658 18 Porter, F. W., Brown, B. & Palmenberg, A. C. Nucleoporin phosphorylation triggered  
659 by the encephalomyocarditis virus leader protein is mediated by mitogen-activated  
660 protein kinases. *J Virol* **84**, 12538-12548 (2010). [https://doi.org:10.1128/jvi.01484-09](https://doi.org/10.1128/jvi.01484-09)
- 661 19 Ricour, C. *et al.* Inhibition of mRNA export and dimerization of interferon regulatory  
662 factor 3 by Theiler's virus leader protein. *J Gen Virol* **90**, 177-186 (2009).  
663 [https://doi.org:10.1099/vir.0.005678-0](https://doi.org/10.1099/vir.0.005678-0)
- 664 20 Bardina, M. V. *et al.* Mengovirus-induced rearrangement of the nuclear pore complex:  
665 hijacking cellular phosphorylation machinery. *J Virol* **83**, 3150-3161 (2009).  
666 [https://doi.org:10.1128/jvi.01456-08](https://doi.org/10.1128/jvi.01456-08)
- 667 21 Aramburu, I. V. & Lemke, E. A. Floppy but not sloppy: Interaction mechanism of FG-  
668 nucleoporins and nuclear transport receptors. *Semin Cell Dev Biol* **68**, 34-41 (2017).  
669 [https://doi.org:10.1016/j.semedb.2017.06.026](https://doi.org/10.1016/j.semedb.2017.06.026)
- 670 22 Beck, M. & Hurt, E. The nuclear pore complex: understanding its function through  
671 structural insight. *Nat Rev Mol Cell Biol* **18**, 73-89 (2017).  
672 [https://doi.org:10.1038/nrm.2016.147](https://doi.org/10.1038/nrm.2016.147)
- 673 23 Hampoelz, B., Andres-Pons, A., Kastiris, P. & Beck, M. Structure and Assembly of  
674 the Nuclear Pore Complex. *Annu Rev Biophys* **48**, 515-536 (2019).  
675 [https://doi.org:10.1146/annurev-biophys-052118-115308](https://doi.org/10.1146/annurev-biophys-052118-115308)
- 676 24 Hülsmann, B. B., Labokha, A. A. & Görlich, D. The permeability of reconstituted  
677 nuclear pores provides direct evidence for the selective phase model. *Cell* **150**, 738-751  
678 (2012). [https://doi.org:10.1016/j.cell.2012.07.019](https://doi.org/10.1016/j.cell.2012.07.019)
- 679 25 Mishra, A., Sipma, W., Veenhoff, L. M., Van der Giessen, E. & Onck, P. R. The Effect  
680 of FG-Nup Phosphorylation on NPC Selectivity: A One-Bead-Per-Amino-Acid  
681 Molecular Dynamics Study. *Int J Mol Sci* **20** (2019).  
682 [https://doi.org:10.3390/ijms20030596](https://doi.org/10.3390/ijms20030596)
- 683 26 Kim, D. I. *et al.* An improved smaller biotin ligase for BioID proximity labeling. *Mol*  
684 *Biol Cell* **27**, 1188-1196 (2016). [https://doi.org:10.1091/mbc.E15-12-0844](https://doi.org/10.1091/mbc.E15-12-0844)
- 685 27 Lobert, P. E., Escriou, N., Ruelle, J. & Michiels, T. A coding RNA sequence acts as a  
686 replication signal in cardioviruses. *Proc Natl Acad Sci U S A* **96**, 11560-11565 (1999).  
687 [https://doi.org:10.1073/pnas.96.20.11560](https://doi.org/10.1073/pnas.96.20.11560)
- 688 28 Ahlmann-Eltze, C. & Anders, S. proDA: Probabilistic Dropout Analysis for Identifying  
689 Differentially Abundant Proteins in Label-Free Mass Spectrometry. *bioRxiv*, 661496  
690 (2020). [https://doi.org:10.1101/661496](https://doi.org/10.1101/661496)

- 691 29 Chen, R. H., Sarnecki, C. & Blenis, J. Nuclear localization and regulation of erk- and  
692 rsk-encoded protein kinases. *Mol Cell Biol* **12**, 915-927 (1992).  
693 <https://doi.org/10.1128/mcb.12.3.915-927.1992>
- 694 30 Allen, J. J. *et al.* A semisynthetic epitope for kinase substrates. *Nat Methods* **4**, 511-516  
695 (2007). <https://doi.org/10.1038/nmeth1048>
- 696 31 Lopez, M. S., Kliegman, J. I. & Shokat, K. M. The logic and design of analog-sensitive  
697 kinases and their small molecule inhibitors. *Methods Enzymol* **548**, 189-213 (2014).  
698 <https://doi.org/10.1016/b978-0-12-397918-6.00008-2>
- 699 32 Ricour, C. *et al.* Random mutagenesis defines a domain of Theiler's virus leader protein  
700 that is essential for antagonism of nucleocytoplasmic trafficking and cytokine gene  
701 expression. *J Virol* **83**, 11223-11232 (2009). <https://doi.org/10.1128/jvi.00829-09>
- 702 33 Cornelis, G. R. & Wolf-Watz, H. The Yersinia Yop virulon: a bacterial system for  
703 subverting eukaryotic cells. *Mol Microbiol* **23**, 861-867 (1997).  
704 <https://doi.org/10.1046/j.1365-2958.1997.2731623.x>
- 705 34 McDonald, C., Vacratsis, P. O., Bliska, J. B. & Dixon, J. E. The yersinia virulence  
706 factor YopM forms a novel protein complex with two cellular kinases. *J Biol Chem*  
707 **278**, 18514-18523 (2003). <https://doi.org/10.1074/jbc.M301226200>
- 708 35 Hentschke, M. *et al.* Yersinia virulence factor YopM induces sustained RSK activation  
709 by interfering with dephosphorylation. *PLoS One* **5** (2010).  
710 <https://doi.org/10.1371/journal.pone.0013165>
- 711 36 De Jesús-González, L. A. *et al.* The Nuclear Pore Complex Is a Key Target of Viral  
712 Proteases to Promote Viral Replication. *Viruses* **13**, 706 (2021).  
713 <https://doi.org/10.3390/v13040706>
- 714 37 Saeed, M. *et al.* Defining the proteolytic landscape during enterovirus infection. *PLoS*  
715 *Pathog* **16**, e1008927 (2020). <https://doi.org/10.1371/journal.ppat.1008927>
- 716 38 Belov, G. A. *et al.* Bidirectional increase in permeability of nuclear envelope upon  
717 poliovirus infection and accompanying alterations of nuclear pores. *J Virol* **78**, 10166-  
718 10177 (2004). <https://doi.org/10.1128/jvi.78.18.10166-10177.2004>
- 719 39 Linder, M. I. *et al.* Mitotic Disassembly of Nuclear Pore Complexes Involves CDK1-  
720 and PLK1-Mediated Phosphorylation of Key Interconnecting Nucleoporins. *Dev Cell*  
721 **43**, 141-156.e147 (2017). <https://doi.org/10.1016/j.devcel.2017.08.020>
- 722 40 Kosako, H. *et al.* Phosphoproteomics reveals new ERK MAP kinase targets and links  
723 ERK to nucleoporin-mediated nuclear transport. *Nat Struct Mol Biol* **16**, 1026-1035  
724 (2009). <https://doi.org/10.1038/nsmb.1656>
- 725 41 Dong, B., Niwa, M., Walter, P. & Silverman, R. H. Basis for regulated RNA cleavage  
726 by functional analysis of RNase L and Ire1p. *Rna* **7**, 361-373 (2001).  
727 <https://doi.org/10.1017/s1355838201002230>
- 728 42 Jnaoui, K. & Michiels, T. Adaptation of Theiler's virus to L929 cells: mutations in the  
729 putative receptor binding site on the capsid map to neutralization sites and modulate  
730 viral persistence. *Virology* **244**, 397-404 (1998).  
731 <https://doi.org/10.1006/viro.1998.9134>
- 732 43 Duke, G. M. & Palmenberg, A. C. Cloning and synthesis of infectious cardiovirus  
733 RNAs containing short, discrete poly(C) tracts. *J Virol* **63**, 1822-1826 (1989).  
734 <https://doi.org/10.1128/jvi.63.4.1822-1826.1989>
- 735 44 Cornilescu, C. C., Porter, F. W., Zhao, K. Q., Palmenberg, A. C. & Markley, J. L. NMR  
736 structure of the mengovirus Leader protein zinc-finger domain. *FEBS Lett* **582**, 896-  
737 900 (2008). <https://doi.org/10.1016/j.febslet.2008.02.023>
- 738 45 Chow, M. *et al.* Myristylation of picornavirus capsid protein VP4 and its structural  
739 significance. *Nature* **327**, 482-486 (1987). <https://doi.org/10.1038/327482a0>

- 740 46 Mertens, J. *et al.* Directly Reprogrammed Human Neurons Retain Aging-Associated  
741 Transcriptomic Signatures and Reveal Age-Related Nucleocytoplasmic Defects. *Cell*  
742 *Stem Cell* **17**, 705-718 (2015). [https://doi.org:10.1016/j.stem.2015.09.001](https://doi.org/10.1016/j.stem.2015.09.001)  
743 47 Follenzi, A., Ailles, L. E., Bakovic, S., Geuna, M. & Naldini, L. Gene transfer by  
744 lentiviral vectors is limited by nuclear translocation and rescued by HIV-1 pol  
745 sequences. *Nat Genet* **25**, 217-222 (2000). [https://doi.org:10.1038/76095](https://doi.org/10.1038/76095)  
746 48 Hermant, P., Francius, C., Clotman, F. & Michiels, T. IFN- $\epsilon$  is constitutively expressed  
747 by cells of the reproductive tract and is inefficiently secreted by fibroblasts and cell  
748 lines. *PLoS One* **8**, e71320 (2013). [https://doi.org:10.1371/journal.pone.0071320](https://doi.org/10.1371/journal.pone.0071320)  
749 49 Cesaro, T. *et al.* PKR activity modulation by phosphomimetic mutations of serine  
750 residues located three aminoacids upstream of double-stranded RNA binding motifs.  
751 *Sci Rep* **11**, 9188 (2021). [https://doi.org:10.1038/s41598-021-88610-z](https://doi.org/10.1038/s41598-021-88610-z)  
752 50 Bollaert, E. *et al.* HBP1 phosphorylation by AKT regulates its transcriptional activity  
753 and glioblastoma cell proliferation. *Cell Signal* **44**, 158-170 (2018).  
754 [https://doi.org:10.1016/j.cellsig.2018.01.014](https://doi.org/10.1016/j.cellsig.2018.01.014)  
755 51 Tossounian, M. A. *et al.* Methionine sulfoxide reductase B from *Corynebacterium*  
756 *diphtheriae* catalyzes sulfoxide reduction via an intramolecular disulfide cascade. *J Biol*  
757 *Chem* **295**, 3664-3677 (2020). [https://doi.org:10.1074/jbc.RA119.012438](https://doi.org/10.1074/jbc.RA119.012438)  
758 52 Cox, J. & Mann, M. MaxQuant enables high peptide identification rates, individualized  
759 p.p.b.-range mass accuracies and proteome-wide protein quantification. *Nat Biotechnol*  
760 **26**, 1367-1372 (2008). [https://doi.org:10.1038/nbt.1511](https://doi.org/10.1038/nbt.1511)  
761 53 Benjamini, Y. & Hochberg, Y. Controlling the False Discovery Rate: A Practical and  
762 Powerful Approach to Multiple Testing. *Journal of the Royal Statistical Society. Series*  
763 *B (Methodological)* **57**, 289-300 (1995).  
764

765

766

## 767 **Acknowledgments**

768 We are grateful to Melissa Drappier for suggesting the analog-sensitive kinase experiments.

769 We are much indebted to Kevan Shokat for quick support and detailed protocols concerning

770 this great technique. We thank Frank J.M. van Kuppeveld for the gift of anti-EMCV capsid

771 antibodies. We thank Stéphane Messe for excellent technical assistance, Nicolas Dauguet for

772 expert help in cell sorting, and Eric Freundt and Frank J.M. van Kuppeveld for critical

773 reading of this manuscript.

774

## 775 **Author Contributions**

776 Conceptualization: B.L.P. and T.M.

777 Methodology: B.L.P, C.L., D.V., F.S. and T.M.

778 Formal analysis: P.H., F.S., L.G.

779 Investigation: B.L.P, F.W., G.H., D.V. and T.M.

780 Writing – original draft: B.L.P.

781 Writing – review & editing: B.L.P., D.V., F.S. and T.M.

782 Supervision: T.M.

783 Project administration: T.M.

784 Funding acquisition: T.M.

785

## 786 **Competing interests**

787 The authors declare no conflicts of interests

788

## 789 **Funding**

790 BLP and CL were the recipients of FRIA fellowship from the belgian FNRS. Work was

791 supported by the EOS joint programme of Fonds de la recherche scientifique-FNRS and

792 Fonds wetenschappelijk onderzoek-Vlaanderen-FWO (EOS ID: 30981113 and 40007527),

793 Belgian fund for Scientific Research (PDR T.0185.14), Loterie Nationale through support to

794 the de Duve Institute and Actions de Recherches Concertées (ARC).

795

## 796 **Figure legends**

797

### 798 **Fig 1. Pathogen's proteins hijack RSK kinases.**

799 (A) Indirect substrate recruitment - model of the clamp: a pathogen's protein acts as an

800 adaptor protein, which binds and activates RSK through its DDVF motif and recruits a target

801 protein to be phosphorylated by RSK through another domain. (B) Direct substrate  
802 recruitment. A pathogen's protein interacts with RSK through its DDVF motif and is directly  
803 phosphorylated by RSK.

804

805 **Fig 2. PTB diffusion and NUP98 hyperphosphorylation induced by cardioviruses**  
806 **depends on both the L protein and RSK kinases.**

807 (A-C and E-G) PTB diffusion out of the nucleus depends on both L and RSK. (A and E)  
808 Confocal microscopy images of HeLa WT cells infected with TMEV for 10h (A) or with  
809 EMCV for 4h (E). (B and F) Graphs showing the percentage of cells with PTB diffusion  
810 (mean  $\pm$  SD), among cells infected by TMEV (3D-positive) for 10h (B) or by EMCV (capsid-  
811 positive) for 5h (F). Counts: 25-50 infected cells per experiment (n=4). \*\*\*\* denotes  
812 significant differences (One-way ANOVA,  $p < 0.0001$ ) between HeLa-RSK-TKO cells  
813 transduced with an empty vector (HeLa TKO) and cells re-expressing indicated RSK  
814 isoforms, for L<sup>WT</sup>-infected samples. (C and G) Confocal microscopy images of HeLa-WT or  
815 HeLa RSK-TKO cells transduced with an empty vector (HeLa TKO) or re-expressing the  
816 indicated RSK isoforms. Cells were infected with TMEV for 10h (C) or EMCV for 4h (G).  
817 3D and 2A were stained as controls of TMEV and EMCV infection respectively. (D and H)  
818 Western blots showing the RSK-dependent hyperphosphorylation of NUP98 (shift upwards)  
819 or the inhibition of PKR activation induced by TMEV (D) or EMCV (H). 3D or 2A were  
820 detected as control of infection, and  $\beta$ -actin as loading control. Dashed lines between lanes  
821 indicate deletion of irrelevant sections from the same membrane.

822

823 **Fig 3. Nucleocytoplasmic traffic perturbation in live cells depends on both the L protein**  
824 **and RSK kinases.**



825 (A-D) Graphs and confocal microscopy pictures showing the quantification of RFP-NLS and  
826 GFP-NES diffusion (mean  $\pm$  SD) in live HeLa-LVX cells infected with TMEV for 10h (A-B)  
827 or EMCV for 4h30 (C-D). HeLa-LVX cells were either WT, or RSK-TKO cells transduced  
828 with an empty vector (HeLa-TKO) or re-expressing RSK1. Counts: 50 cells per experiment  
829 (n=4). (E-G) Impact of L on nucleocytoplasmic traffic. HeLa-LVX cells transfected with an  
830 empty plasmid or with plasmids expressing L<sup>WT</sup>, L mutants or YopM. (E) Confocal  
831 microscopy of HeLa-LVX cells 24hours post-transfection. (F) Western blot of HeLa-LVX  
832 cells 24h post-transfection. FLAG staining shows the expression of L proteins and YopM.  
833 (G) Graph showing the percentage of cells with GFP-NES and RFP-NLS diffusion (mean  $\pm$   
834 SD). Counts: 70 $\pm$ 5 cells per experiment (n=6). One-way ANOVA test was used to compare  
835 all samples to L<sup>WT</sup>. \*\*\*\* denotes significant differences (One-way ANOVA, p < 0.0001).  
836 Scale bar: 20 $\mu$ m

837

838 **Fig 4. BioID-RSK and BioID-L fusion proteins biotinylate specific proteins during**  
839 **cardiovirus infection.**

840 (A) Cartoon showing the expected biotinylation by BioID-RSK or BioID-L fusion proteins of  
841 a target recruited by the C-terminal domain of L. (B) Western blot of proteins biotinylated by  
842 BioID-RSK in lysates and pulled down samples of TMEV infected cells. HeLa BioID-RSK  
843 cells were incubated for 2 days without biotin. Cells were then infected for 16h (MOI 2.5)  
844 with L<sup>WT</sup> or L<sup>M60V</sup> viruses in medium containing 5 $\mu$ M biotin. Biotinylated proteins were  
845 pulled-down using streptavidin-magnetic beads. (C) Schematic representation of BioID-L  
846 TMEV replicon constructs. Capsid protein sequences were replaced by BioID-L and GFP  
847 sequences. The beginning of the VP4 sequence was kept in order to allow BioID-L protein  
848 processing by viral protease 3C, and the CRE sequence (localized in VP2) was added to  
849 allow replication. (D) Western blot of proteins biotinylated by BioID-L in lysates and pulled

850 down samples of TMEV infected cells. HeLa cells were infected for 14h (MOI 2.5) with  
851 BioID-L<sup>WT</sup>, BioID-L<sup>M60V</sup> or BioID-L<sup>F48A</sup> replicons in medium containing 5µM biotin.  
852 Biotinylated proteins were then pulled-down using streptavidin-magnetic beads.

853

854 **Fig 5. BioID-RSK and BioID-L proxomes identify FG-NUPs as targets recruited by the**  
855 **L-RSK complex.**

856 (A) Proteins identified in the proximity of BioID-RSK (y axis) and BioID-L (x axis). Y-axis  
857 shows proteins detected after infection with L<sup>WT</sup> but not L<sup>M60V</sup> viruses (=PSMs in  
858  $L^{WT}/(L^{M60V}+NI+1)$ ). X-axis shows proteins detected after infection with BioID-L<sup>WT</sup> or  
859 BioID-L<sup>F48A</sup> but not BioID-L<sup>M60V</sup> replicons (= PSMs in  $(L^{WT}+L^{F48A})/(L^{M60V}+NI+1)$ ). FG-  
860 NUPs are identified by green dots. (B) Table showing the adjusted P-values for the 20 best  
861 ranked proteins. Ranking was attributed by multiplying the BioID-RSK ratio by the BioID-L  
862 ratio. Statistical analysis of pairwise comparisons made between L<sup>WT</sup> and L<sup>M60V</sup> for BioID-  
863 RSK and between L<sup>WT</sup> and L<sup>M60V</sup> or L<sup>F48A</sup> and L<sup>M60V</sup> for BioID-L. Adjusted P-values < 0.05  
864 are colored in red, FG-NUPs are colored in green. (C) Volcano plots showing the same  
865 pairwise comparisons as in B. Proteins having an adjusted P-value < 0.05 and a Log<sub>2</sub> fold  
866 change (LFC) > 1 are colored in red (= proteins in Q2). FG-NUPs are colored in green.

867

868 **Fig 6. Subcellular localization of proteins biotinylated by BioID-RSK.**

869 (A) Confocal microscopy images of biotinylated proteins (green) and 3D viral polymerase  
870 (red) detected in BioID-RSK expressing HeLa cells infected with L<sup>WT</sup> or L<sup>M60V</sup> viruses for  
871 10h (MOI 5). (B) Quantification of cells showing a visible nuclear rim of biotinylated  
872 proteins in HeLa BioID-RSK cells infected with L<sup>WT</sup> or L<sup>M60V</sup> viruses (mean ± SD). Counts:  
873 42 ± 10 infected cells per experiment (n=4). One-way ANOVA tests were used to compare  
874 all samples with each other, \*\*\*\* denotes significant differences (p < 0.0001). (C) BioID-

875 RSK biotinylates proteins that colocalize with the FG-NUP NUP98. Confocal microscopy  
876 images of biotinylated proteins (green), 3D viral polymerase (red), and NUP98 (orange) in  
877 HeLa BioID-RSK cells infected with L<sup>WT</sup> or L<sup>M60V</sup> viruses for 10h (MOI 5). 3D viral  
878 polymerase was stained as a control of infection. White arrows point to examples of cells  
879 exhibiting a nuclear rim staining. Scale bar: 10 $\mu$ m.

880

881 **Fig 7. Subcellular localization of proteins biotinylated by BioID-L.**

882 (A) Confocal microscopy images of biotinylated proteins stained with streptavidin-Alexa  
883 Fluor 594 (orange) and 3D viral polymerase (green) in HeLa cells infected for 10h with  
884 BioID-L<sup>WT</sup>, BioID-L<sup>M60V</sup> or BioID-L<sup>F48A</sup> replicons (MOI 5). (B) Quantification of nuclear  
885 rim staining in HeLa cells infected with BioID-L<sup>WT</sup>, BioID-L<sup>M60V</sup> or BioID-L<sup>F48A</sup> viruses  
886 (mean  $\pm$  SD). Counts: 31  $\pm$  11 infected cells per experiment (n=4). One-way ANOVA tests  
887 were used to compare all samples with each other, \*\*\*\* denotes significant differences ( $p <$   
888 0.0001). 3D viral polymerase was stained as a control of infection. (C) BioID-L biotinylates  
889 proteins that colocalize with the FG-NUP POM121. Confocal microscopy images of  
890 biotinylated proteins (orange) and POM121 (green) in HeLa cells infected with BioID-L<sup>WT</sup>,  
891 BioID-L<sup>M60V</sup> or BioID-L<sup>F48A</sup> viruses for 10h (MOI 5). White arrows point to examples of  
892 cells exhibiting a nuclear rim staining. Scale bar: 10 $\mu$ m.

893

894 **Fig 8. RSK directly phosphorylates NUP98 in TMEV and EMCV infected cells.**

895 (A) Cartoon showing the principle of the analog-sensitive kinase system. The kinase mutated  
896 in the ATP binding pocket (As-RSK) can use regular ATP as well as a bulkier ATP analog  
897 (A\*TP-S). Use of the ATP analog induces the thiophosphorylation of the substrate. After an  
898 alkylation reaction with paranitrobenzylmesylate (PNBM), thiophosphates are converted to  
899 thiophosphate esters, which are specifically recognized by an anti-thiophosphate ester

900 antibody. All other wild-type kinases in the cell, have normal ATP binding pockets that  
901 cannot accommodate the ATP analog. (B) Identification of the gatekeeper residue in RSK2.  
902 The gatekeeper residue of RSK2 was identified by aligning the sequences of c-SRC (P00523)  
903 with those of the N-terminal kinase domain of RSKs (RSK1: Q15418, RSK2: P51812, RSK3:  
904 Q15349, RSK4: Q9UK32). Typically, the gatekeeper residue aligns with T338 of c-SRC, and  
905 is preceded by two hydrophobic amino acids and followed by an acidic and another  
906 hydrophobic amino acid. RSK2 gatekeeper residue was thereby identified as L147. (C-E)  
907 HeLa cells expressing As2-RSK or WT-RSK were infected with TMEV for 8h (MOI 5) (C  
908 and E) or with EMCV for 3h30min (MOI 5) (D). Cells were then permeabilized with  
909 digitonin, and N6-Bn-ATP- $\gamma$ -S was added for 1 hour. Cells were then lysed and either  
910 NUP98 (C and D) or thio-phosphate-ester containing proteins were immunoprecipitated (E).  
911 (C and D) Immunoblots showing a concentrated amount of NUP98 in the  
912 immunoprecipitation samples and thiophosphate-ester proteins. (E) Immunoblots showing  
913 NUP98 in the thiophosphate ester IP fraction when L<sup>WT</sup> is present. Detection of viral capsid  
914 in the lysates was made as control for infection.

Fig. 1

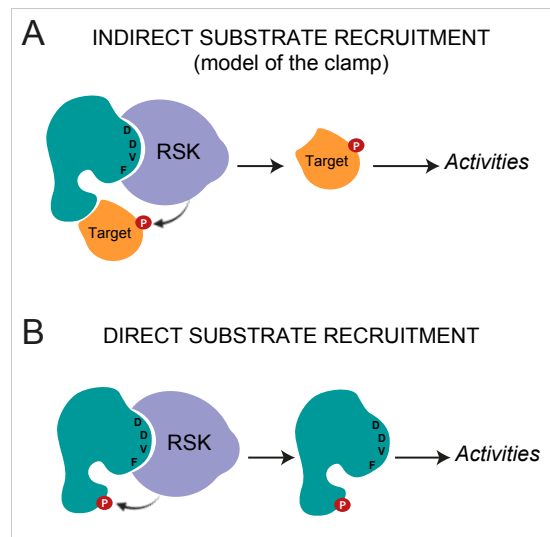



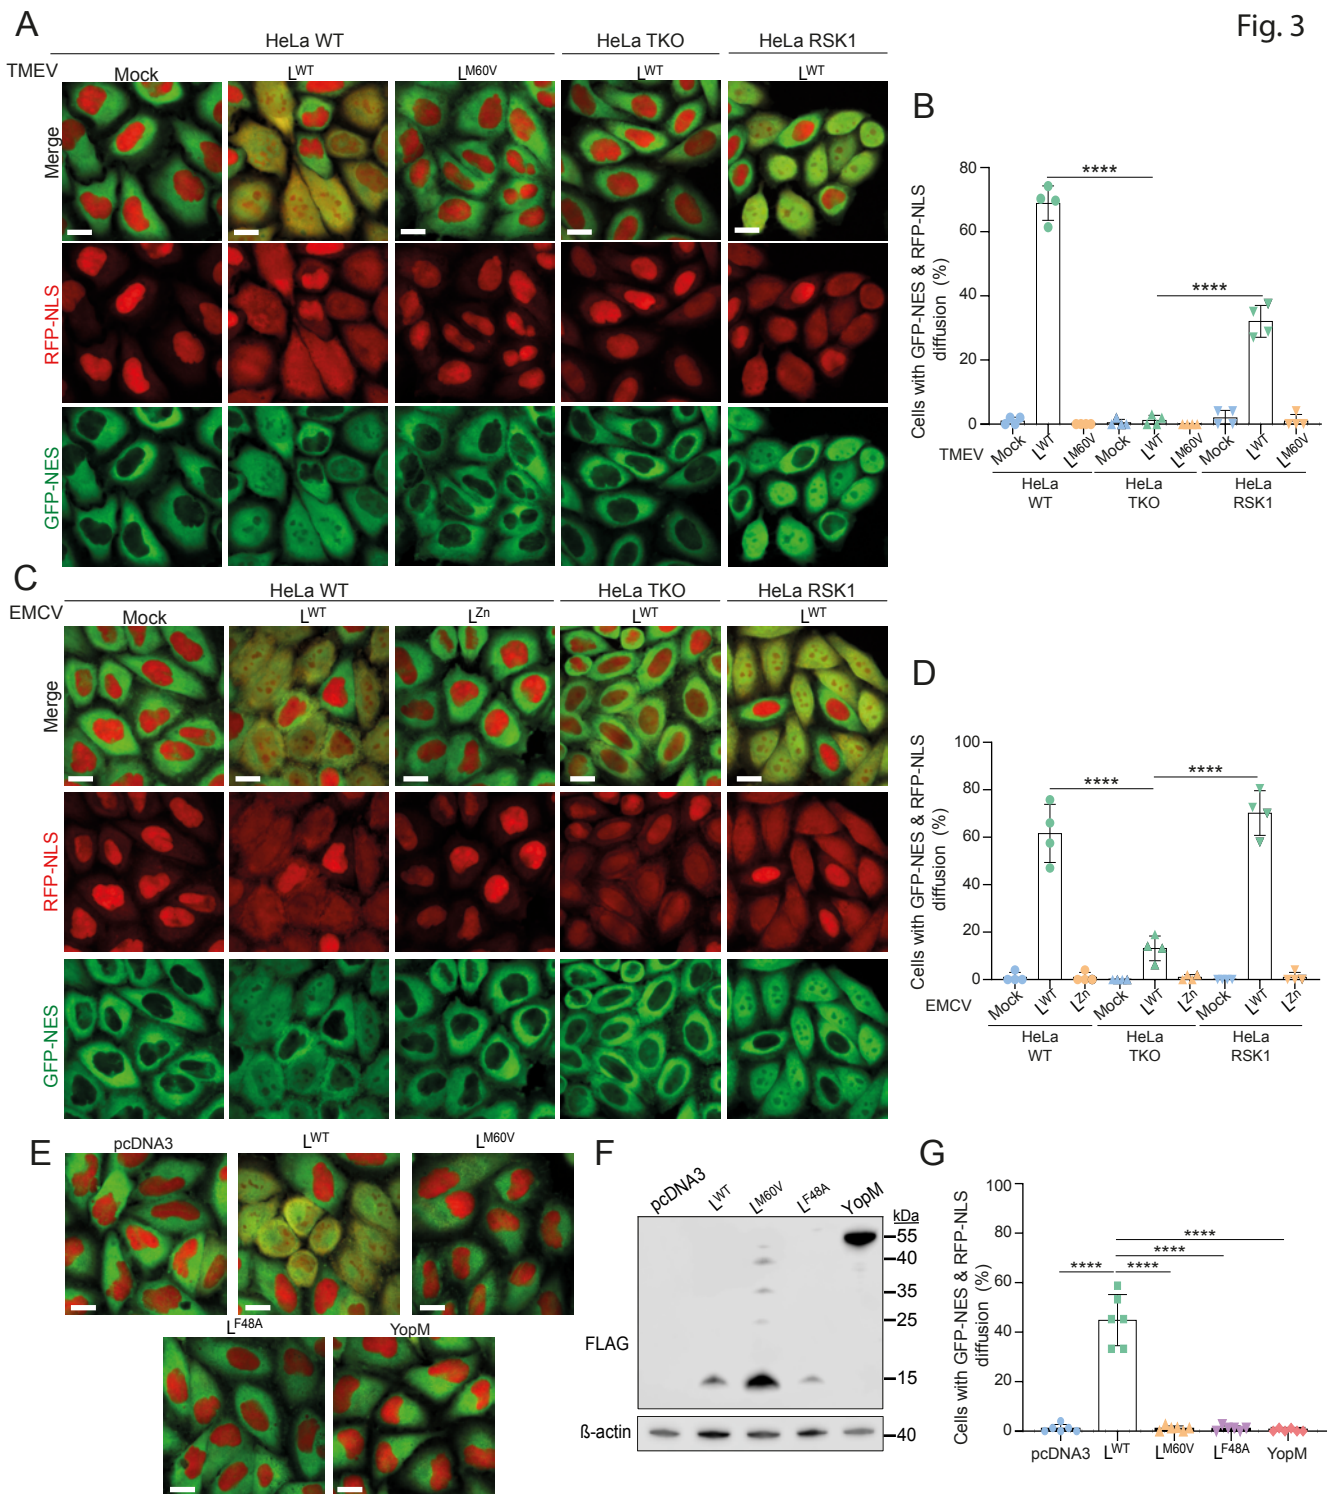

Fig. 3

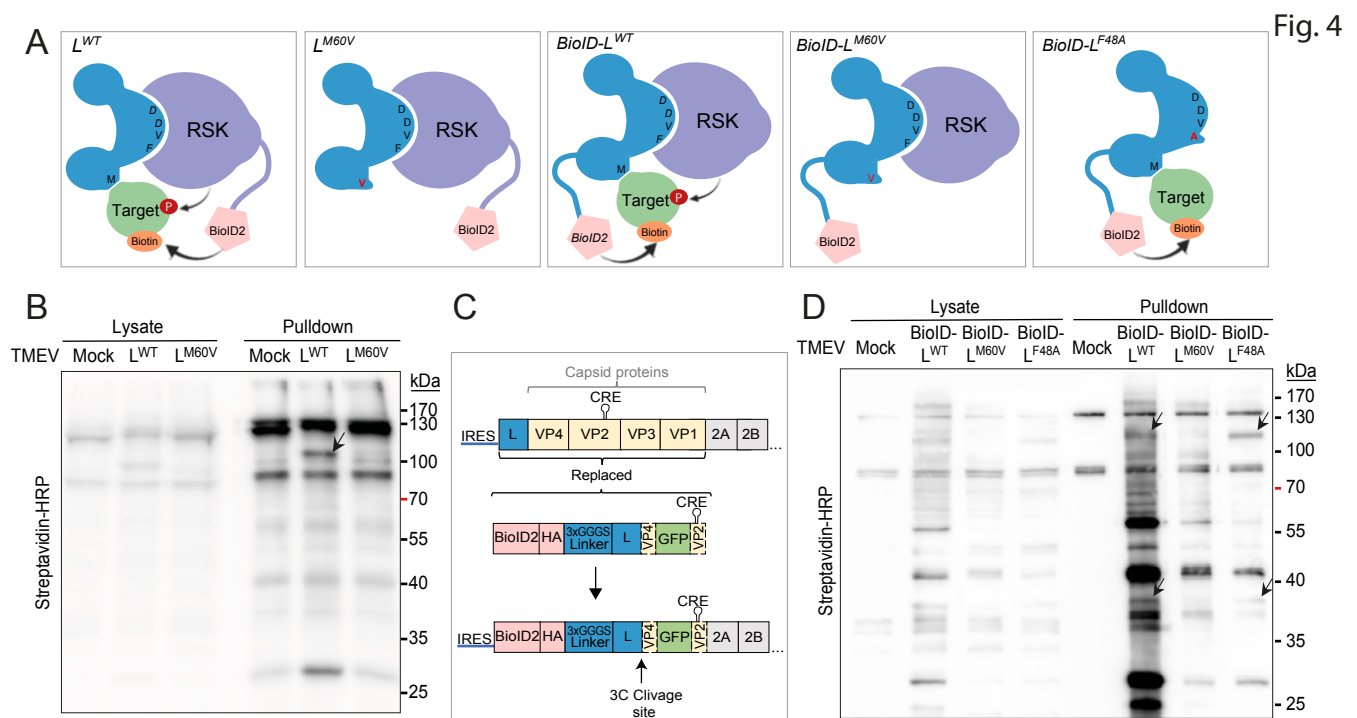

Fig. 4



**A** Fig. 5

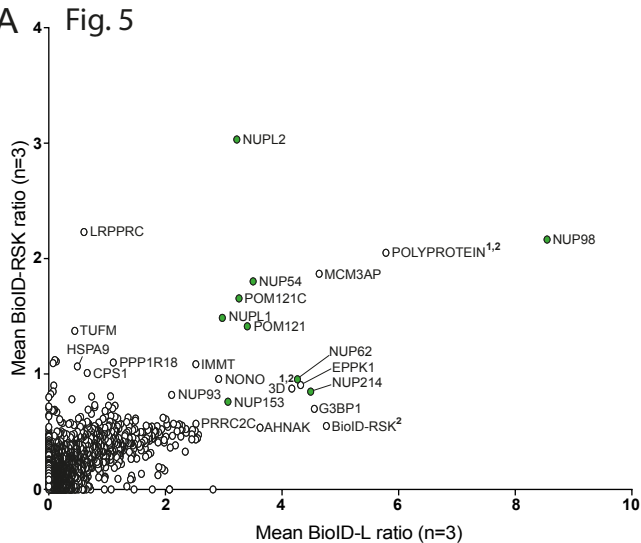

**B**

| Ranking | BioID-RSK ratio |                            | BioID-RSK ratio (mean) | BioID-L ratio (mean) | Adj. P-value BioID-L |                         |                                       |
|---------|-----------------|----------------------------|------------------------|----------------------|----------------------|-------------------------|---------------------------------------|
|         | x               | Gene name                  |                        |                      | WT vs L              | WT vs L <sup>M60V</sup> | F <sup>48A</sup> vs L <sup>M60V</sup> |
| 1       | 18.51           | NUP98                      | 2.17                   | 8.55                 | 0.558                | 0.003                   | 0.001                                 |
| 2       | 11.85           | POLYPROTEIN <sup>1,2</sup> | 2.05                   | 5.78                 | NA                   | NA                      | NA                                    |
| 3       | 9.78            | NUP121                     | 3.03                   | 3.22                 | 0.429                | 0.081                   | 0.740                                 |
| 4       | 8.67            | MCM3AP                     | 1.87                   | 4.64                 | 0.614                | 0.003                   | 0.001                                 |
| 5       | 6.32            | NUP54                      | 1.80                   | 3.51                 | 0.827                | 0.039                   | 0.112                                 |
| 6       | 5.40            | POM121C                    | 1.66                   | 3.26                 | 0.429                | 0.057                   | 0.192                                 |
| 7       | 4.81            | POM121                     | 1.41                   | 3.40                 | 0.827                | 0.032                   | 0.085                                 |
| 8       | 4.43            | NUP1                       | 1.49                   | 2.98                 | 0.614                | 0.015                   | 0.007                                 |
| 9       | 4.07            | NUP62                      | 0.95                   | 4.26                 | 0.558                | 0.015                   | 0.007                                 |
| 10      | 3.91            | EPPK1                      | 0.90                   | 4.32                 | 0.827                | 0.033                   | 0.975                                 |
| 11      | 3.81            | NUP214                     | 0.85                   | 4.49                 | 0.827                | 0.015                   | 0.002                                 |
| 12      | 3.64            | 3D <sup>1,2</sup>          | 0.87                   | 4.17                 | NA                   | NA                      | NA                                    |
| 13      | 3.18            | G3BP1                      | 0.70                   | 4.55                 | 0.827                | 0.015                   | 0.493                                 |
| 14      | 2.79            | NONO                       | 0.96                   | 2.91                 | 0.827                | 0.062                   | 0.839                                 |
| 15      | 2.74            | IMMT                       | 1.09                   | 2.52                 | 0.827                | 0.028                   | 0.740                                 |
| 16      | 2.62            | BIOID-RSK2 <sup>2</sup>    | 0.55                   | 4.76                 | NA                   | NA                      | NA                                    |
| 17      | 2.34            | NUP153                     | 0.76                   | 3.07                 | 0.827                | 0.024                   | 0.024                                 |
| 18      | 1.94            | AHNAK                      | 0.54                   | 3.62                 | 0.903                | 0.237                   | 0.813                                 |
| 19      | 1.73            | NUP93                      | 0.82                   | 2.11                 | 0.827                | 0.081                   | 0.493                                 |
| 20      | 1.44            | PRRC2C                     | 0.57                   | 2.52                 | 0.827                | 0.045                   | 0.916                                 |

<sup>1</sup>Viral proteins

<sup>2</sup>Data of identified peptides belonging to shared protein groups.

**C**

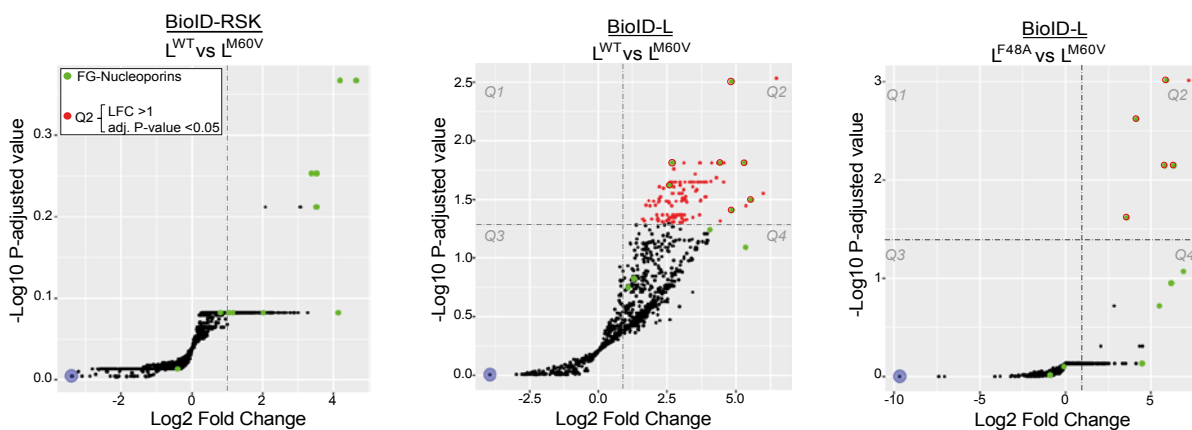

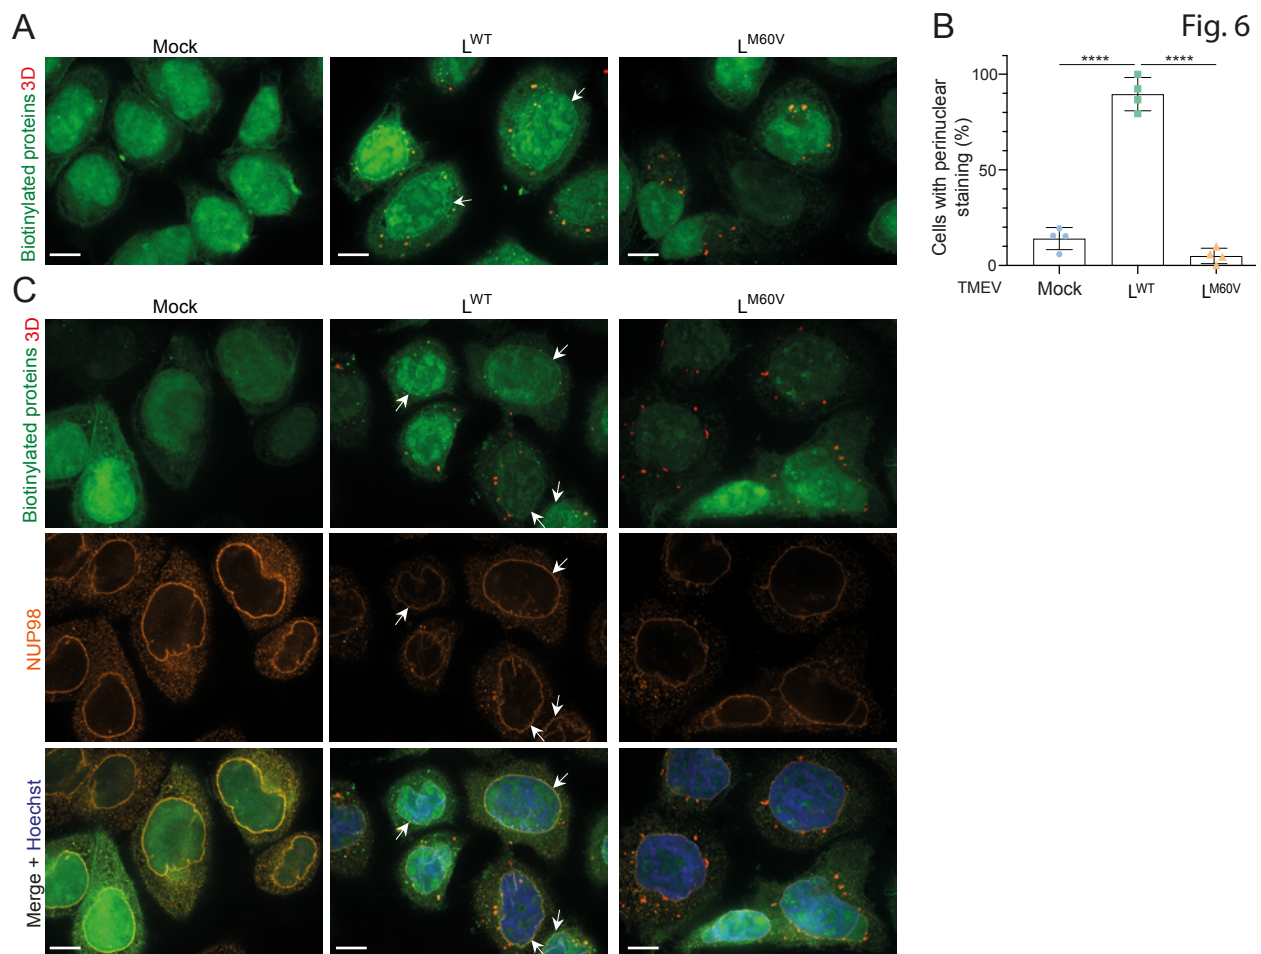

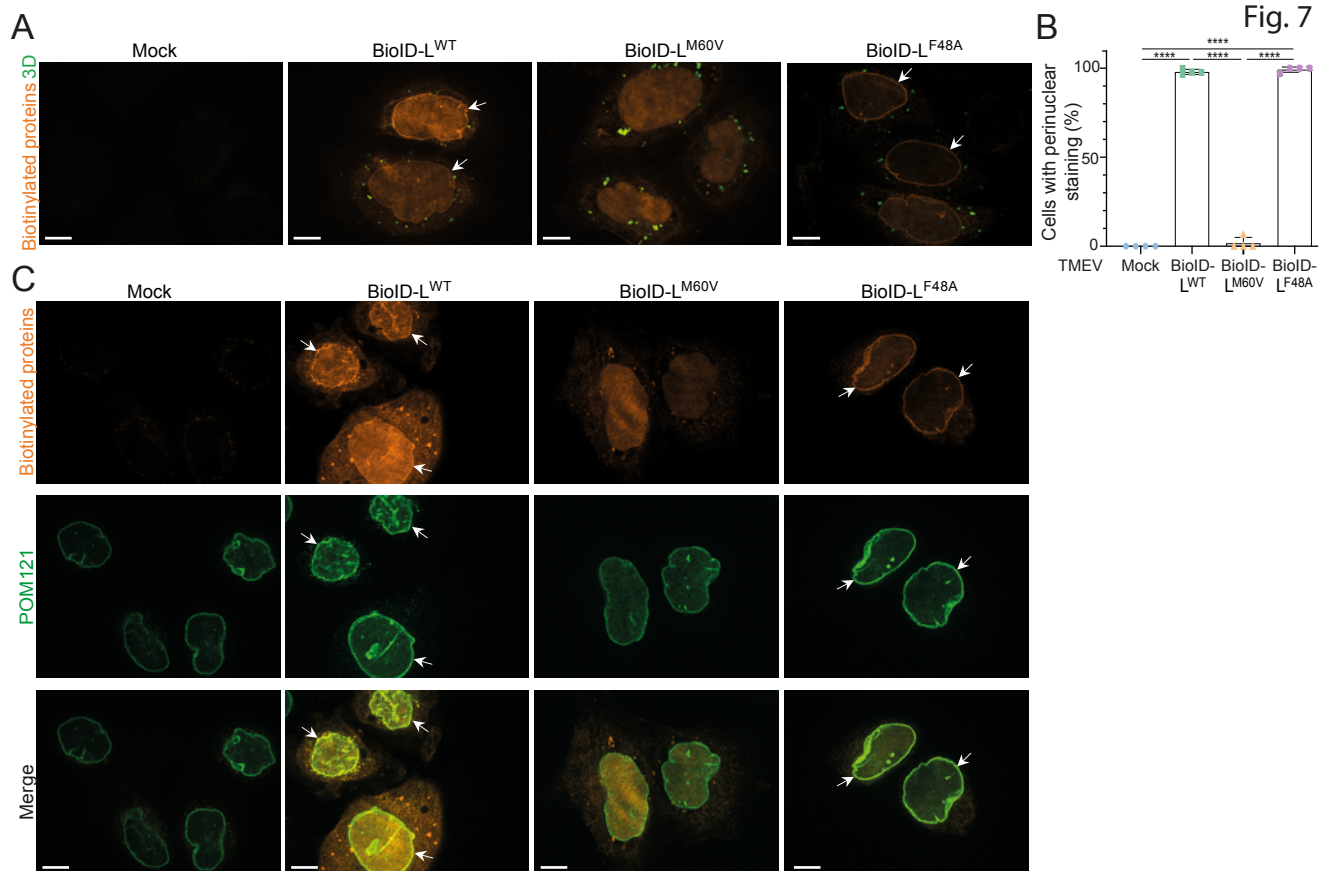

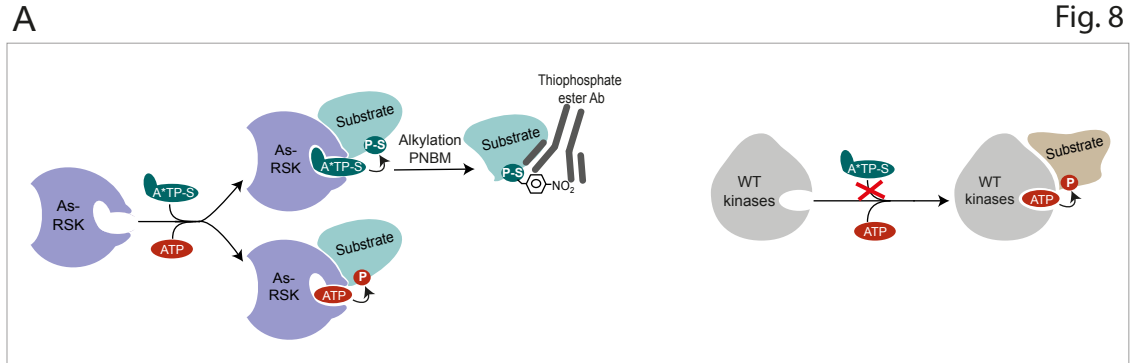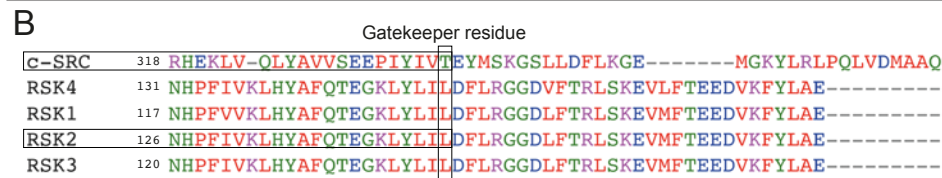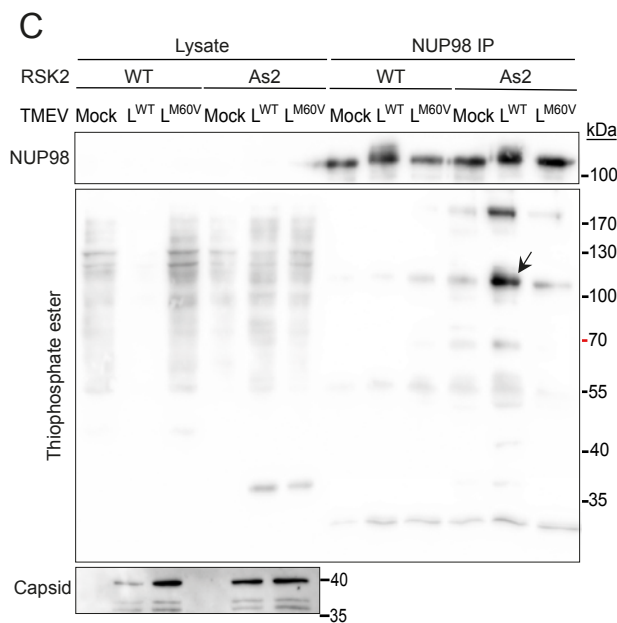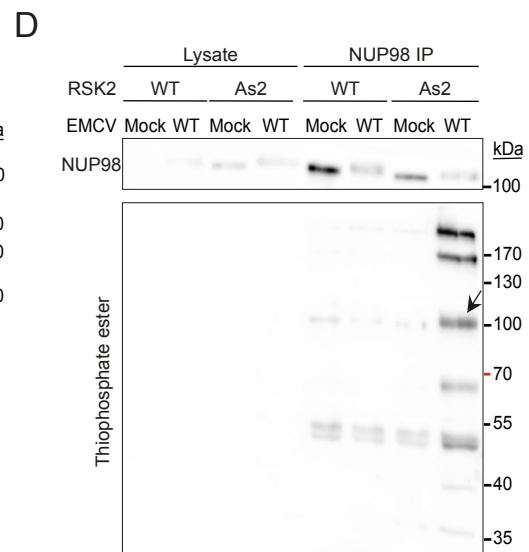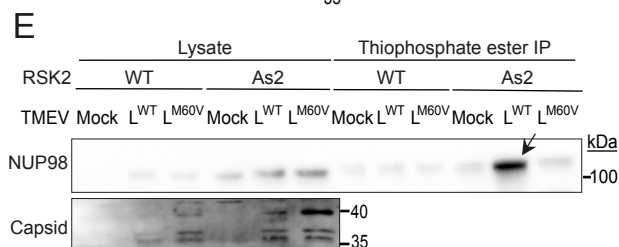

Source: https://www.biorxiv.org/content/10.1101/2022.06.16.496404v2.full.pdf
